# Supplementary material for: Predictors of mortality in acute ischemic stroke treated with endovascular thrombectomy despite successful reperfusion: subgroup analysis of a multicentre randomised clinical trial
Source: PubMed Central journal article supplement — BMJ Open. 2022 Mar 1;12(3):e053765. doi: 10.1136/bmjopen-2021-053765 (PMC8889322; doi:10.1136/bmjopen-2021-053765), 2022-03-01
Supplement: bmjopen-2021-053765.draft_revisions.pdf [file bmjopen-2021-053765.draft_revisions.pdf]

# BMJ Open

BMJ Open is committed to open peer review. As part of this commitment we make the peer review history of every article we publish publicly available.

When an article is published we post the peer reviewers' comments and the authors' responses online. We also post the versions of the paper that were used during peer review. These are the versions that the peer review comments apply to.

The versions of the paper that follow are the versions that were submitted during the peer review process. They are not the versions of record or the final published versions. They should not be cited or distributed as the published version of this manuscript.

BMJ Open is an open access journal and the full, final, typeset and author-corrected version of record of the manuscript is available on our site with no access controls, subscription charges or pay-per-view fees (<http://bmjopen.bmj.com>).

If you have any questions on BMJ Open's open peer review process please email [info.bmjopen@bmj.com](mailto:info.bmjopen@bmj.com)

# BMJ Open

## Predictors of mortality in acute ischemic stroke treated with endovascular thrombectomy despite successful reperfusion: subgroup analysis of DIRECT-MT

|                               |                                                                                                                                                                                                                                                                                                                                                                                                                                                                                                                                                                                                                                                                                                                                                                                                                                                                                                                                                                                                                                                                                                                                                                                                                                                                                                                                                                                                                                                                                                                                                  |
|-------------------------------|--------------------------------------------------------------------------------------------------------------------------------------------------------------------------------------------------------------------------------------------------------------------------------------------------------------------------------------------------------------------------------------------------------------------------------------------------------------------------------------------------------------------------------------------------------------------------------------------------------------------------------------------------------------------------------------------------------------------------------------------------------------------------------------------------------------------------------------------------------------------------------------------------------------------------------------------------------------------------------------------------------------------------------------------------------------------------------------------------------------------------------------------------------------------------------------------------------------------------------------------------------------------------------------------------------------------------------------------------------------------------------------------------------------------------------------------------------------------------------------------------------------------------------------------------|
| Journal:                      | <i>BMJ Open</i>                                                                                                                                                                                                                                                                                                                                                                                                                                                                                                                                                                                                                                                                                                                                                                                                                                                                                                                                                                                                                                                                                                                                                                                                                                                                                                                                                                                                                                                                                                                                  |
| Manuscript ID                 | bmjopen-2021-053765                                                                                                                                                                                                                                                                                                                                                                                                                                                                                                                                                                                                                                                                                                                                                                                                                                                                                                                                                                                                                                                                                                                                                                                                                                                                                                                                                                                                                                                                                                                              |
| Article Type:                 | Original research                                                                                                                                                                                                                                                                                                                                                                                                                                                                                                                                                                                                                                                                                                                                                                                                                                                                                                                                                                                                                                                                                                                                                                                                                                                                                                                                                                                                                                                                                                                                |
| Date Submitted by the Author: | 26-May-2021                                                                                                                                                                                                                                                                                                                                                                                                                                                                                                                                                                                                                                                                                                                                                                                                                                                                                                                                                                                                                                                                                                                                                                                                                                                                                                                                                                                                                                                                                                                                      |
| Complete List of Authors:     | Li, Hao; Maoming People's Hospital, Department of Neurology<br>Huang, Jinbo ; Maoming People's Hospital, Department of Neurology<br>Cao, Jie; Changzhou First People's Hospital, Neurosurgery<br>Ye, Shisheng; Maoming People's Hospital, Department of Neurology<br>Chen, Hai ; Maoming People's Hospital, Department of Neurology<br>Liao, Geng ; Maoming People's Hospital, Department of Neurology<br>Du, Weijie ; Maoming People's Hospital, Department of Neurology<br>Li, Chaomao ; Maoming People's Hospital, Department of Neurology<br>Yuan, Li ; Maoming People's Hospital, Department of Neurology<br>Fang, Ling ; Maoming People's Hospital, Department of Neurology<br>Yang, Pengfei; Naval Medical University Changhai hospital, Department of Neurosurgery<br>Zhang, Yong-wei; Naval Medical University Changhai hospital, Department of Neurology<br>Xing, Pengfei; Naval Medical University Changhai hospital, Department of Neurology<br>Zhang, Xiaoxi ; Naval Medical University Changhai hospital, Department of Neurosurgery<br>Ye, Xiaofei; Naval Medical University, Department of Statistics<br>Peng, Ya; Changzhou No. 1 People's Hospital, Department of Neurosurgery<br>Liu, Sheng ; Jiangsu Provincial People's Hospital of Nanjing Medical University, Department of Radiology<br>Zhang, Liyong; Liaocheng People's Hospital, Department of Neurosurgery<br>Yang, Zhi; Maoming People's Hospital, Department of Neurology<br>Liu, Jianmin ; Naval Medical University Changhai hospital, Department of Neurosurgery |
| Keywords:                     | Stroke < NEUROLOGY, Neurology < INTERNAL MEDICINE, NEUROSURGERY                                                                                                                                                                                                                                                                                                                                                                                                                                                                                                                                                                                                                                                                                                                                                                                                                                                                                                                                                                                                                                                                                                                                                                                                                                                                                                                                                                                                                                                                                  |
|                               |                                                                                                                                                                                                                                                                                                                                                                                                                                                                                                                                                                                                                                                                                                                                                                                                                                                                                                                                                                                                                                                                                                                                                                                                                                                                                                                                                                                                                                                                                                                                                  |

SCHOLARONE™  
Manuscripts

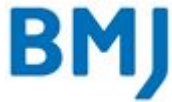

I, the Submitting Author has the right to grant and does grant on behalf of all authors of the Work (as defined in the below author licence), an exclusive licence and/or a non-exclusive licence for contributions from authors who are: i) UK Crown employees; ii) where BMJ has agreed a CC-BY licence shall apply, and/or iii) in accordance with the terms applicable for US Federal Government officers or employees acting as part of their official duties; on a worldwide, perpetual, irrevocable, royalty-free basis to BMJ Publishing Group Ltd ("BMJ") its licensees and where the relevant Journal is co-owned by BMJ to the co-owners of the Journal, to publish the Work in this journal and any other BMJ products and to exploit all rights, as set out in our [licence](#).

The Submitting Author accepts and understands that any supply made under these terms is made by BMJ to the Submitting Author unless you are acting as an employee on behalf of your employer or a postgraduate student of an affiliated institution which is paying any applicable article publishing charge ("APC") for Open Access articles. Where the Submitting Author wishes to make the Work available on an Open Access basis (and intends to pay the relevant APC), the terms of reuse of such Open Access shall be governed by a Creative Commons licence – details of these licences and which [Creative Commons](#) licence will apply to this Work are set out in our licence referred to above.

Other than as permitted in any relevant BMJ Author's Self Archiving Policies, I confirm this Work has not been accepted for publication elsewhere, is not being considered for publication elsewhere and does not duplicate material already published. I confirm all authors consent to publication of this Work and authorise the granting of this licence.

**Title page****Predictors of mortality in acute ischemic stroke treated with endovascular thrombectomy despite successful reperfusion: subgroup analysis of DIRECT-MT**

Hao Li1†, Jinbo Huang1†, Jie Cao2†, Shisheng Ye1, Hai Chen1, Geng Liao1, Weijie Du1, Chaomao Li1, Li Yuan1, Ling Fang1, Pengfei Yang3, Yongwei Zhang4, Pengfei Xing4, Xiaoxi Zhang3, Xiaofei Ye5, Ya Peng2, Sheng Liu6, Liyong Zhang7\*, Zhi Yang1\*, Jianmin Liu3, on behalf of the direct-mt investigators

Corresponding Author:

Liyong Zhang, [13346256936@163.com](mailto:13346256936@163.com); Zhi Yang, [mmyangz@163.com](mailto:mmyangz@163.com).

†Three authors contributed equally to this editorial.

Number of Tables: 2; Supplemental material:1; Word count: 3669.

**Keywords:** acute ischemic stroke; reperfusion; mortality; mechanical thrombectomy

## Abstract

**Objectives:** We sought to determine the predictors of 90-day mortality despite successful reperfusion.

**Design:** Subgroup analysis of a multicenter randomized clinical trial.

**Setting:** This study used data from the DIRECT-MT ( Direct Intra-arterial thrombectomy in order to Revascularize AIS patients with large vessel occlusion Efficiently in Chinese Tertiary hospitals: a Multicenter randomized clinical Trial) trial.

**Participants:** 622 patients enrolled in DIRECT-MT.

**Results:** Overall successful reperfusion rate was 82.0% (510/622), and 18.5% (115/622) of patients died within 90 days. Univariate analysis identified increased risks of mortality for age  $\geq 70$  years, history of diabetes mellitus, National Institutes of Health Stroke Scale (NIHSS) score at baseline  $\geq 17$ , Alberta Stroke Program Early Computed Tomography Score (ASPECTS)  $< 9$ , glucose level at hospital arrival  $\geq 130$  mg/dl, location of internal carotid artery occlusion, embolization into a new territory, symptomatic ICH, and a decreased risk of mortality for smoking. In multivariable analysis, smoking (OR, 0.38; 95% CI, 0.17 to 0.83;  $P=0.015$ ), NIHSS score  $\geq 17$  (OR, 3.14; 95% CI, 1.77 to 5.55;  $P<0.001$ ), glucose level at hospital arrival  $\geq 130$  mg/dl (OR, 2.54; 95% CI, 1.51 to 4.27;  $P<0.001$ ), and symptomatic ICH (OR, 11.70; 95% CI, 4.74 to 28.89;  $P<0.001$ ) were significant independent predictors of 90-day mortality.

**Conclusions:** Symptomatic ICH is a strong predictor of 90-day mortality in acute ischemic stroke treated with mechanical thrombectomy despite successful reperfusion, as well as, severe neurologic deficits (NIHSS score  $\geq 17$ ) and high glucose level (glucose level  $\geq 130$ mg/dl) at hospital arrival. However, further studies need to be performed to confirm the association between smoking and mortality.

### Strengths and limitations of this study

The study used a multicenter randomized clinical trial data from DIRECT-MT.

The large sample size provides robustness and strong statistical power for the reported outcomes.

All patients in the DIRECT-MT trial were Chinese, which may limit the generalizability of the findings to other populations.

## Introduction

The overwhelming benefit of endovascular thrombectomy for acute ischemic stroke (AIS) with large-vessel occlusion in the anterior circulation has been demonstrated<sup>1-5</sup>. A large number of studies show that successful reperfusion was a powerful predictor of good outcomes in acute ischemic stroke. However, despite the rates of successful reperfusion (modified Thrombolysis in Cerebral Infarction (mTICI) score 2b or 3) up to 71%, the mortality at 90 days remains high, approximately up to 15%<sup>6</sup>. Thus, it remains important to understand which factors influence mortality despite successful reperfusion. Some studies have identified predictors that influence mortality in patients with acute stroke treated with the thrombectomy, such as age, National Institute of Health Stroke Scale (NIHSS) score, vessel occlusion site, passes with the thrombectomy device and use of rescue therapy<sup>7, 8</sup>. But the predictors of mortality despite successful reperfusion have been less intensively addressed thus far.

Direct Intra-arterial thrombectomy in order to Revascularize AIS patients with large vessel occlusion Efficiently in Chinese Tertiary hospitals: a Multicenter randomized clinical Trial (DIRECT-MT) is an investigator-initiated, multicenter, prospective, randomized, open-label trial, designed to determine whether endovascular thrombectomy alone would be noninferior to combined treatment with endovascular thrombectomy preceded by intravenous alteplase in patients who had acute ischemic stroke with large-vessel occlusion in the anterior circulation<sup>9</sup>. Thus, in this subgroup analysis, using the data from DIRECT-MT trial, we investigated the predictors of 90-day mortality in acute ischemic stroke treated with endovascular thrombectomy despite successful reperfusion. Approval to conduct this study was obtained from the institutional review board.

## Methods

### Patients Selection

Study patients were obtained from the DIRECT-MT trial of patients with good quality final angiographic images (performed with digital subtraction angiography) could be assessed for eTICI by the core laboratory. Details of the DIRECT-MT patient selection

1  
2  
3  
4 can be found in the original report<sup>9</sup>.

## 5 6 **Data**

7  
8 In addition to patient demographic and baseline characteristics, data included  
9  
10 information on radiological imaging, procedural complications, symptomatic ICH and  
11  
12 clinical outcomes. Successful reperfusion was defined as achieving the eTICI score  
13  
14 (range, 0 [no reperfusion] to 3 [complete reperfusion]) of 2b, 2c, or 3 on the final  
15  
16 angiogram after thrombectomy<sup>10</sup>. Symptomatic intracranial hemorrhage (ICH) was  
17  
18 defined on the basis of Heidelberg criteria<sup>11</sup>. Cause of stroke was determined according  
19  
20 to the medical history, clinical features, and results on digital subtraction angiography,  
21  
22 including cardioembolism, intracranial atherosclerosis, ipsilateral extracranial internal  
23  
24 carotid artery (ICA) obstruction and undetermined. All radiological imaging was  
25  
26 assessed by an independent imaging core-lab blinded to the trial group assignments. All  
27  
28 imaging was read by two independent readers and a consensus reading was performed  
29  
30 by a senior reader of each team in case of discrepancies. More details of the design,  
31  
32 methods and results of DIRECT-MT trial have been reported previously<sup>12</sup>.

## 33 34 **Statistical Analysis**

35  
36 Since for age, NIHSS score at baseline, Alberta Stroke Program Early Computed  
37  
38 Tomography Score and glucose level at hospital arrival we observed a nonlinear  
39  
40 relationship, we determined the optimal cutoff value discriminating between mortality  
41  
42 and survival using restricted cubic spline functions. Data are presented as numbers with  
43  
44 percentages. Pearson chi-square test or Fisher exact test was used to compare baseline  
45  
46 characteristics, angiographic outcomes, procedural complications and symptomatic  
47  
48 between the mortality and survival groups in univariate analysis. Variables with  $P \leq 0.05$   
49  
50 in the univariate analysis were included in the multivariable logistic regression model-  
51  
52 building process, except symptomatic ICH, to evaluate association with 90-day  
53  
54 mortality. Multivariable models were built basing on backwards selection. The  
55  
56 retention criterion was set at  $p \leq 0.05$ . In the second multivariable model, symptomatic  
57  
58 ICH was included as covariate to determine whether symptomatic ICH modifies the  
59  
60 estimated effect of the baseline characteristics as predictors of mortality. All data were  
processed using the SAS software, version 9.2 (SAS Institute).

## Patient and Public Involvement

Patients and/or the public were not involved in the design, or conduct, or reporting, or dissemination plans of this research.

## Results

The DIRECT-MT enrolled 656 consecutive patients with acute ischemic stroke treated with endovascular thrombectomy with or without intravenous alteplase. A total of 17 patients were primarily excluded, because poor quality angiographic images could not be assessed for eTICI, thus leaving 622 patients to participate in the analysis. Of these, 510 patients (77.7%) achieved successful reperfusion (eTICI  $\geq 2b$ ). Mortality was lower in patients with successful reperfusion compared with those without successful reperfusion (15.3% [78/510] versus 33.0% [37/112];  $P < 0.001$ ). In successful reperfusion patients, procedural complications (vessel dissection, contrast extravasation, embolization into a new territory, femoral access complications) occurred in 73 patients (14.3%).

The shape of the relationship with age, NIHSS score at baseline, ASPECTS score and glucose level appeared to be nonlinear (online supplementary Figure I). We identified a value of 70 years for age, 17 for NIHSS score, 9 for ASPECT score and 130 mg/dl for glucose level as optimal cutoff value for discriminating deceased from survived patients. Baseline characteristics, angiographic outcomes, procedural complications and symptomatic ICH for study patients are summarized in table 1. The mortality group had a significantly higher prevalence of age  $\geq 70$  years, diabetes mellitus, NIHSS score at baseline  $\geq 17$ , ASPECTS score  $< 9$ , glucose level at hospital arrival  $\geq 130$  mg/dl, location of internal carotid artery occlusion, embolization into a new territory, symptomatic ICH than the survival group had. Inversely, prevalence of smoking was lower in mortality group. There was no difference was found for sex, hypertension, hypercholesterolemia, previous ischemic stroke, peripheral artery disease, heart disease, atrial fibrillation, chronic heart failure, myocardial infarction, mechanical aorta and/or mitral valve rep, statin, antiplatelet agents, anticoagulant pretreatment, intravenous thrombolysis, cause of stroke, anesthesia, extracranial stent placement, intracranial stent placement, vessel dissection, contrast extravasation, femoral access complications.



1  
2  
3  
4 In multivariable analysis (Table 2), NIHSS score  $\geq 17$  (OR, 3.14; 95% CI, 1.77 to 5.55;  
5  $P < 0.001$ ) and glucose level at hospital arrival  $\geq 130$  mg/dl (OR, 2.54; 95% CI, 1.51 to  
6 4.27;  $P < 0.001$ ) remained independently associated with a higher risk of mortality. The  
7 rate of smoking (OR, 0.38; 95% CI, 0.17 to 0.83;  $P = 0.015$ ) remained lower in mortality  
8 group. In the second multivariable model, symptomatic ICH was significant (OR, 11.70;  
9 95% CI, 4.74 to 28.89;  $P < 0.001$ ) when added to the model but did not substantively  
10 change the estimated effects of smoking, NIHSS score at baseline  $\geq 17$ , and glucose level  
11 at hospital arrival  $\geq 130$  mg/dl.  
12  
13  
14  
15  
16  
17  
18

### 19 Discussion

20  
21 In the present study, we used data from the DIRECT-MT trial to identify potential  
22 clinical, angiographic, procedural complications, and symptomatic ICH factors of 90-  
23 day mortality in acute ischemic stroke treated with endovascular thrombectomy despite  
24 successful reperfusion. We found that NIHSS score at baseline  $\geq 17$  and glucose level at  
25 hospital arrival  $\geq 130$  mg/dl were independently associated with higher mortality,  
26 whereas smoking was associated with lower risk of mortality. Furthermore,  
27 symptomatic ICH significantly increased mortality, whereas procedural complications  
28 were not associated with mortality. Similar to the original report of DIRECT-MT,  
29 intravenous thrombolysis was not associated with 90-day mortality in successful  
30 reperfusion patients. Other factors, such as age, proximal occlusion, diabetes mellitus,  
31 although reported in previous studies<sup>8, 13</sup>, were not related to mortality in our analysis.  
32 For anterior circulation stroke, a high NIHSS score on admission has been correlated  
33 with 90-day mortality after endovascular thrombectomy despite successful reperfusion<sup>8</sup>,  
34 in line with the present study. This indicates that it is difficult to reverse the outcome  
35 of stroke with severe neurological deficit (as indicated by a high NIHSS score) despite  
36 successful reperfusion. In our analysis of the DIRECT-MT data, we determined a  
37 NIHSS score cutoff value of 17, and NIHSS score  $\geq 17$  increased the risk of a mortality  
38 approximately threefold, whereas the increase estimated for glucose level was two.  
39 In our study, we found that glucose level at hospital arrival  $\geq 130$  mg/dL can increase  
40 the risk of 90-day mortality. Hyperglycemia (defined as admission serum glucose  $> 140$   
41 mg/dL), similarly to present study previously has been correlated with poor outcomes  
42  
43  
44  
45  
46  
47  
48  
49  
50  
51  
52  
53  
54  
55  
56  
57  
58  
59  
60

1  
2  
3  
4 or mortality in acute ischemic stroke patients with large vessel occlusion after  
5 endovascular thrombectomy<sup>14,15</sup>. In previous studies and present study, hyperglycemia  
6 was defined in accordance with the absolute glucose concentration, failing to  
7 distinguish between poor management of diabetes and a physiologic stress response to  
8 acute stroke. Recently, a novel index of stress hyperglycemia ratio (SHR, the admission  
9 random blood glucose divided by the glycosylated hemoglobin level) was proved to be  
10 a better predictor of poor outcome or mortality than absolute hyperglycemia in patients  
11 treated with endovascular thrombectomy<sup>16,17</sup>. But we did not collect hemoglobin level  
12 and could not calculate SHR to assess the association between SHR and mortality after  
13 endovascular thrombectomy for acute occlusion in the anterior circulation. However,  
14 there is no evidence that the administration of intravenous insulin improves functional  
15 outcomes or mortality rates in acute ischemic stroke<sup>18</sup>.

16  
17 Smoking is a well-known independent risk factor for stroke. Interestingly, previous  
18 studies have reported that smoking was associated with a lower risk of mortality<sup>19,20</sup>,  
19 calling smoking paradox in literature. Currently, the mechanism of the smoking  
20 paradox has not yet been explained, and its existence is controversial. Some researchers  
21 insisted that the smoking paradox was probably caused by unmeasured or residual  
22 confounding, younger age and other differences in baseline characteristics, not the  
23 biological effects of smoking<sup>21-23</sup>. Statistical methods such as multivariable regression  
24 or propensity score analysis may address most, but not all, of the confounding in risk  
25 analyses. Furthermore, previous studies and our study did not distinguish current  
26 smokers from ex-smokers and had no medical record of the quantity of smoking.  
27 Therefore, we could not assess the effects of smoking status and quantity on the  
28 outcome.

29  
30 We further found symptomatic ICH resulted in significantly increased mortality. In our  
31 study, 5.3% cases with successful reperfusion developed symptomatic ICH, similarly  
32 to what is reported in randomized controlled trials (4.4%)<sup>6</sup>. But there was no difference  
33 in the incidence of symptomatic ICH between successful reperfusion with failed  
34 reperfusion patients. Interestingly, Möhlenbruch et al. published a report on risk factors  
35 of intracranial hemorrhage after endovascular thrombectomy of anterior circulation  
36  
37  
38  
39  
40  
41  
42  
43  
44  
45  
46  
47  
48  
49  
50  
51  
52  
53  
54  
55  
56  
57  
58  
59  
60

1  
2  
3  
4 ischemic stroke<sup>24</sup>. In their analysis, they found complete reperfusion (eTICI 3) were  
5  
6 attributable to lower ICH rate in comparison to subtotal recanalization (eTICI 2b, eTICI  
7  
8 2c), and had lower quantity of thrombectomy maneuvers, which was a risk factor of  
9  
10 hemorrhagic transformation.

11  
12 Our analysis has several limitations. First, DIRECT-MT trial was designed in  
13  
14 accordance with the 2015 American Heart Association/American Stroke Association  
15  
16 guidelines<sup>25</sup>. All stent retriever devices approved by China Food and Drug  
17  
18 Administration were allowed in the trial as a first line, and aspiration devices were  
19  
20 allowed as a second option. Recently, newer generation devices such as aspiration  
21  
22 catheters have been used as first-line devices for large vessel occlusion. In addition, all  
23  
24 patients in the DIRECT-MT trial were Chinese, which may limit the generalizability of  
25  
26 the findings to other populations. Moreover, DIRECT-MT trial did not distinguish  
27  
28 current smokers from ex-smokers and had no medical record of the quantity of smoking,  
29  
30 which probably resulted in the smoking paradox. Finally, we could not exclude  
31  
32 overfitting in multivariate analyses, as well as, a loss of power to identify independent  
33  
34 predictors.

### 35 **Conclusions**

36  
37 In conclusion, symptomatic ICH is a strong predictor of 90-day mortality in acute  
38  
39 ischemic stroke treated with endovascular thrombectomy despite successful reperfusion,  
40  
41 as well as, a severe neurological deficit (NIHSS score $\geq$ 17) and high glucose level  
42  
43 (glucose level  $\geq$ 130mg/dl) at hospital arrival. However, further studies need to be  
44  
45 performed to confirm the association between smoking and mortality.

### 46 **Author affiliations**

47  
48  
49 <sup>1</sup> Department of Neurology, Maoming People's Hospital, Maoming, China

50  
51  
52 <sup>2</sup> Department of Neurosurgery, Third Affiliated Hospital of Soochow University,  
53  
54 Changzhou, China

55  
56  
57 <sup>3</sup> Department of Neurosurgery, Naval Medical University Changhai hospital, Shanghai,  
58  
59 China

60  
<sup>4</sup> Department of Neurology, Naval Medical University Changhai hospital, Shanghai,  
China

1  
2  
3  
4  
5  
6  
7  
8  
9  
10  
11  
12  
13  
14  
15  
16  
17  
18  
19  
20  
21  
22  
23  
24  
25  
26  
27  
28  
29  
30  
31  
32  
33  
34  
35  
36  
37  
38  
39  
40  
41  
42  
43  
44  
45  
46  
47  
48  
49  
50  
51  
52  
53  
54  
55  
56  
57  
58  
59  
60

<sup>5</sup> Department of Statistics, Naval Medical University Changhai hospital, Shanghai, China

<sup>6</sup> Department of Radiology, Jiangsu Provincial People's Hospital of Nanjing Medical University, Nanjing, China

<sup>7</sup> Department of Neurosurgery, Liaocheng People's Hospital of Shandong First Medical University, Liaocheng, China

**Acknowledgement:** We thank all DIRECT-MT investigators.

### **Author Contributions**

ZY, LYZ and JML contributed to conception and design of the study. HL, JBH, JC and SSY drafted the manuscript or tables or figures. PFY, YWZ, PFX and XXZ contributed to comments on the draft manuscript and revised the report. Site investigators contributed to data acquisition not analysis. HC, GL, WJD, CML, LY, LF, YP and SL coordinated the study. XFY conducted the statistical analysis.

### **Ethics Approval**

This trial was approved by Ethics Committee (EC) of Shanghai Changhai Hospital (ID: CHEC2018-003) on Jan 15,2018.

### **Conflict of Interest Statement**

None declared.

### **Funding Sources**

This study was supported by High-level Hospital Construction Research Project of Maoming People's Hospital (no grant number).

**Data sharing statement:** The data that support the findings of this study are available from the corresponding author upon reasonable request.

## References

1. Campbell B, Mitchell P, Kleinig T, et al. Endovascular therapy for ischemic stroke with perfusion-imaging selection. *The New England journal of medicine*. 2015;372:1009-18 doi: 10.1056/NEJMoa1414792
2. Saver J, Goyal M, Bonafe A, et al. Stent-retriever thrombectomy after intravenous t-pa vs. T-pa alone in stroke. *The New England journal of medicine*. 2015;372:2285-95 doi: 10.1056/NEJMoa1415061
3. Goyal M, Demchuk A, Menon B, et al. Randomized assessment of rapid endovascular treatment of ischemic stroke. *The New England journal of medicine*. 2015;372:1019-30 doi: 10.1056/NEJMoa1414905
4. Berkhemer O, Fransen P, Beumer D, et al. A randomized trial of intraarterial treatment for acute ischemic stroke. *The New England journal of medicine*. 2015;372:11-20 doi: 10.1056/NEJMoa1411587
5. Jovin T, Chamorro A, Cobo E, et al. Thrombectomy within 8 hours after symptom onset in ischemic stroke. *The New England journal of medicine*. 2015;372:2296-306 doi: 10.1056/NEJMoa1503780
6. Goyal M, Menon B, van Zwam W, et al. Endovascular thrombectomy after large-vessel ischaemic stroke: A meta-analysis of individual patient data from five randomised trials. *Lancet (London, England)*. 2016;387:1723-31 doi: 10.1016/s0140-6736(16)00163-x
7. Shi Z, Loh Y, Walker G, et al. Clinical outcomes in middle cerebral artery trunk occlusions versus secondary division occlusions after mechanical thrombectomy: Pooled analysis of the mechanical embolus removal in cerebral ischemia (merci) and multi merci trials. *Stroke*. 2010;41:953-60 doi: 10.1161/strokeaha.109.571943
8. Linfante I, Walker G, Castonguay A, et al. Predictors of mortality in acute ischemic stroke intervention: Analysis of the north american solitaire acute stroke registry. *Stroke*. 2015;46:2305-8 doi: 10.1161/strokeaha.115.009530

- 1  
2  
3  
4 9. Yang P, Zhang Y, Zhang L, et al. Endovascular thrombectomy with or without  
5 intravenous alteplase in acute stroke. *N Engl J Med*. 2020;382:1981-93 doi:  
6 10.1056/NEJMoa2001123  
7
- 8  
9 10. Goyal M, Fargen K, Turk A, et al. 2c or not 2c: Defining an improved  
10 revascularization grading scale and the need for standardization of angiography  
11 outcomes in stroke trials. *Journal of neurointerventional surgery*. 2014;6:83-6  
12 doi: 10.1136/neurintsurg-2013-010665  
13
- 14 11. von Kummer R, Broderick J, Campbell B, et al. The heidelberg bleeding  
15 classification: Classification of bleeding events after ischemic stroke and  
16 reperfusion therapy. *Stroke*. 2015;46:2981-6 doi:  
17 10.1161/strokeaha.115.010049  
18
- 19 12. Yang P, Treurniet K, Zhang L, et al. Direct intra-arterial thrombectomy in order  
20 to revascularize ais patients with large vessel occlusion efficiently in chinese  
21 tertiary hospitals: A multicenter randomized clinical trial (direct-mt)-protocol.  
22 *International journal of stroke : official journal of the International Stroke*  
23 *Society*. 2020;15:689-98 doi: 10.1177/1747493019882837  
24
- 25 13. Panni P, Gory B, Xie Y, et al. Acute stroke with large ischemic core treated by  
26 thrombectomy. *Stroke*. 2019;50:1164-71 doi: 10.1161/strokeaha.118.024295  
27
- 28 14. Kim J, Jahan R, Saver J. Impact of glucose on outcomes in patients treated with  
29 mechanical thrombectomy: A post hoc analysis of the solitaire flow restoration  
30 with the intention for thrombectomy study. *Stroke*. 2016;47:120-7 doi:  
31 10.1161/strokeaha.115.010753  
32
- 33 15. Goyal N, Tsivgoulis G, Pandhi A, et al. Admission hyperglycemia and  
34 outcomes in large vessel occlusion strokes treated with mechanical  
35 thrombectomy. *Journal of NeuroInterventional Surgery*. 2018;10:112 doi:  
36 10.1136/neurintsurg-2017-012993  
37
- 38 16. Wang L, Zhou Z, Tian X, et al. Impact of relative blood glucose changes on  
39 mortality risk of patient with acute ischemic stroke and treated with mechanical  
40 thrombectomy. *Journal of Stroke and Cerebrovascular Diseases*. 2019;28:213-  
41 19 doi: 10.1016/j.jstrokecerebrovasdis.2018.09.036  
42  
43  
44  
45  
46  
47  
48  
49  
50  
51  
52  
53  
54  
55  
56  
57  
58  
59  
60

17. Chen X, Liu Z, Miao J, et al. High stress hyperglycemia ratio predicts poor outcome after mechanical thrombectomy for ischemic stroke. *Journal of stroke and cerebrovascular diseases : the official journal of National Stroke Association*. 2019;28:1668-73 doi: 10.1016/j.jstrokecerebrovasdis.2019.02.022
18. Bellolio MF, Gilmore RM, Stead LG. Insulin for glycaemic control in acute ischaemic stroke. *The Cochrane database of systematic reviews*. 2011;Cd005346 doi: 10.1002/14651858.CD005346.pub3
19. Tong X, Wang C, Liao X, et al. Smoking-thrombolysis relationship depends on ischemic stroke subtype. *Stroke*. 2016;47:1811-6 doi: 10.1161/strokeaha.116.013124
20. Ali S, Smith E, Bhatt D, et al. Paradoxical association of smoking with in-hospital mortality among patients admitted with acute ischemic stroke. *Journal of the American Heart Association*. 2013;2:e000171 doi: 10.1161/jaha.113.000171
21. Zhang P, Guo Z, Sun X, et al. Meta-analysis of the smoker's paradox in acute ischemic stroke patients receiving intravenous thrombolysis or endovascular treatment. *Nicotine & tobacco research : official journal of the Society for Research on Nicotine and Tobacco*. 2019;21:1181-88 doi: 10.1093/ntr/ntz094
22. Kurmann R, Engelter S, Michel P, et al. Impact of smoking on clinical outcome and recanalization after intravenous thrombolysis for stroke: Multicenter cohort study. *Stroke*. 2018;49:1170-75 doi: 10.1161/strokeaha.117.017976
23. Wang H, Huang C, Sun Y, et al. Smoking paradox in stroke survivors?: Uncovering the truth by interpreting 2 sets of data. *Stroke*. 2020;51:1248-56 doi: 10.1161/strokeaha.119.027012
24. Neuberger U, Kickingeder P, Schönenberger S, et al. Risk factors of intracranial hemorrhage after mechanical thrombectomy of anterior circulation ischemic stroke. *Neuroradiology*. 2019;61:461-69 doi: 10.1007/s00234-019-02180-6
25. Powers W, Derdeyn C, Biller J, et al. 2015 american heart association/american stroke association focused update of the 2013 guidelines for the early

management of patients with acute ischemic stroke regarding endovascular treatment: A guideline for healthcare professionals from the american heart association/american stroke association. *Stroke*. 2015;46:3020-35 doi: 10.1161/str.0000000000000074

**Table1** Baseline characteristics, angiographic outcomes, procedural details and complications in mortality and survival at 90 days.

| 项目                                       | Mortality<br>n=78 | Survival<br>n=432 | P value |
|------------------------------------------|-------------------|-------------------|---------|
| age $\geq$ 70                            | 49(62.82)         | 198(45.83)        | 0.0057  |
| sex (male)                               | 44(56.41)         | 250(57.87)        | 0.8102  |
| Diabetes Mellitus                        | 23(29.49)         | 72(16.67)         | 0.0074  |
| Hypertension                             | 51(65.38)         | 259(59.95)        | 0.3659  |
| Hypercholesterolemia                     | 1(1.28)           | 18(4.17)          | 0.3611  |
| Previous ischemic stroke                 | 11(14.10)         | 59(13.66)         | 0.9163  |
| Peripheral artery disease                | 0(0.00)           | 3(0.69)           | 1.0000  |
| Heart disease                            | 44(56.41)         | 221(51.16)        | 0.3928  |
| Atrial fibrillation                      | 43(55.13)         | 192(44.44)        | 0.0815  |
| Chronic heart failure                    | 4(5.13)           | 26(6.02)          | 0.9632  |
| Myocardial infarction                    | 6(7.69)           | 23(5.32)          | 0.5717  |
| Mechanical aorta and/or mitral valve rep | 1(1.28)           | 10(2.31)          | 0.8773  |
| Smoking                                  | 8(10.26)          | 112(25.93)        | 0.0027  |
| Statin                                   | 4(5.13)           | 37(8.56)          | 0.3042  |
| Antiplatelet agents                      | 13(16.67)         | 72(16.67)         | 1.0000  |
| Anticoagulant pretreatment               | 6(7.69)           | 34(7.87)          | 0.9571  |
| NIHSS score at baseline $\geq$ 17        | 60(76.92)         | 214(49.54)        | <0.0001 |
| ASPECT score < 9                         | 47(61.04)         | 201(46.74)        | 0.0208  |



|                                           |           |            |         |
|-------------------------------------------|-----------|------------|---------|
| Intravenous thrombolysis                  | 40(51.28) | 227(52.55) | 0.8370  |
| Glucose level $\geq$ 130 mg/dl            | 50        | 171        | <0.0001 |
| Location of intracranial artery occlusion |           |            |         |
| ICA                                       | 40(51.28) | 142(32.87) | 0.0075  |
| M1 middle cerebral artery segment         | 32(41.03) | 248(57.41) |         |
| M2 middle cerebral artery segment         | 6(7.69)   | 42(9.72)   |         |
| Cause of stroke                           |           |            |         |
| Cardioembolic                             | 39(50.00) | 189(43.75) | 0.1399  |
| Intracranial atherosclerosis              | 10(12.82) | 32(7.41)   |         |
| Ipsilateral extracranial                  | 4(5.13)   | 44(10.19)  |         |
| Undetermined                              | 25(32.05) | 167(38.66) |         |
| Anesthesia                                |           |            |         |
| Local anesthesia                          | 27(35.06) | 158(37.26) | 0.2423  |
| Sedation                                  | 18(23.38) | 129(30.42) |         |
| General anesthesia                        | 32(41.56) | 137(32.31) |         |
| Extracranial stent placement              | 2(2.56)   | 37(8.56)   | 0.0664  |
| Intracranial stent placement              | 11(14.10) | 37(8.56)   | 0.1232  |
| Procedural complications                  |           |            |         |
| Vessel dissection                         | 2(2.56)   | 6(1.39)    | 0.7843  |
| Contrast extravasation                    | 3(3.85)   | 7(1.62)    | 0.3891  |
| Embolization into a new territory         | 14(17.95) | 40(9.26)   | 0.0217  |
| Femoral access complications              | 0(0.00)   | 1(0.23)    | 1.0000  |
| Symptomatic ICH                           | 16(20.51) | 11(2.55)   | <0.0001 |

NIHSS, National Institutes of Health Stroke Scale; ASPECTS, Alberta Stroke Program Early Computed Tomography Score; ICA, internal carotid artery; ICH, intracranial hemorrhage.

**Table 2.** Independent predictors of 90-day mortality.

|                 | Model 1         |         | Model 2           |         |
|-----------------|-----------------|---------|-------------------|---------|
|                 | OR (95% CI)     | P value | OR (95% CI)       | P value |
| Smoking         | 0.38(0.17-0.83) | 0.015   | 0.30(0.13-0.70)   | 0.005   |
| NIHSS score     | 3.14(1.77-5.55) | <0.001  | 3.08 (1.70-5.60)  | <0.001  |
| Glucose level   | 2.54(1.51-4.27) | <0.001  | 2.62(1.52-4.52)   | <0.001  |
| Symptomatic ICH | Not include     | -       | 11.70(4.74-28.89) | <0.001  |

NIHSS, National Institutes of Health Stroke Scale; ICH, intracranial hemorrhage.

1  
2  
3  
4  
5  
6  
7  
8  
9  
10  
11  
12  
13  
14  
15  
16  
17  
18  
19  
20  
21  
22  
23  
24  
25  
26  
27  
28  
29  
30  
31  
32  
33  
34  
35  
36  
37  
38  
39  
40  
41  
42  
43  
44  
45  
46  
47  
48  
49  
50  
51  
52  
53  
54  
55  
56  
57  
58  
59  
60

**A**

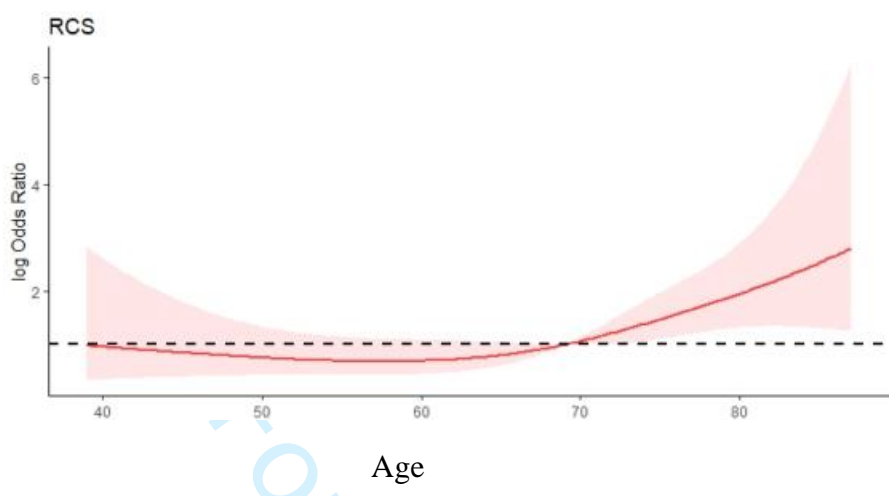

**B**

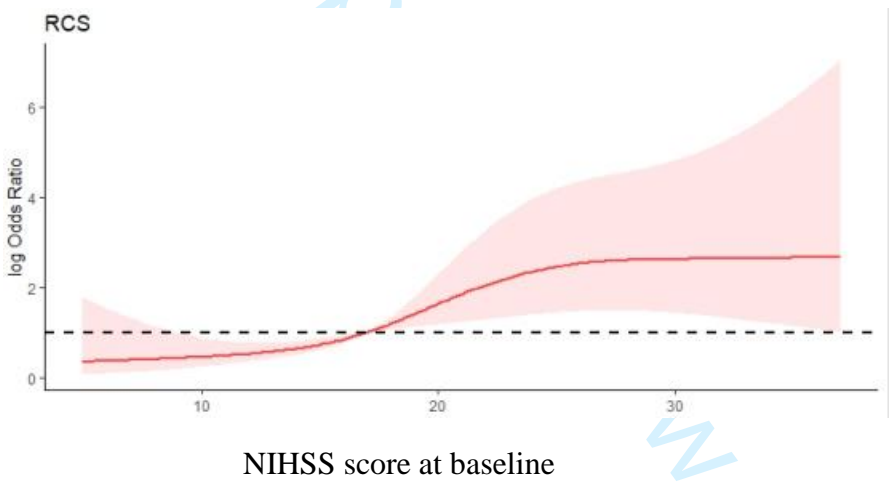

**C**

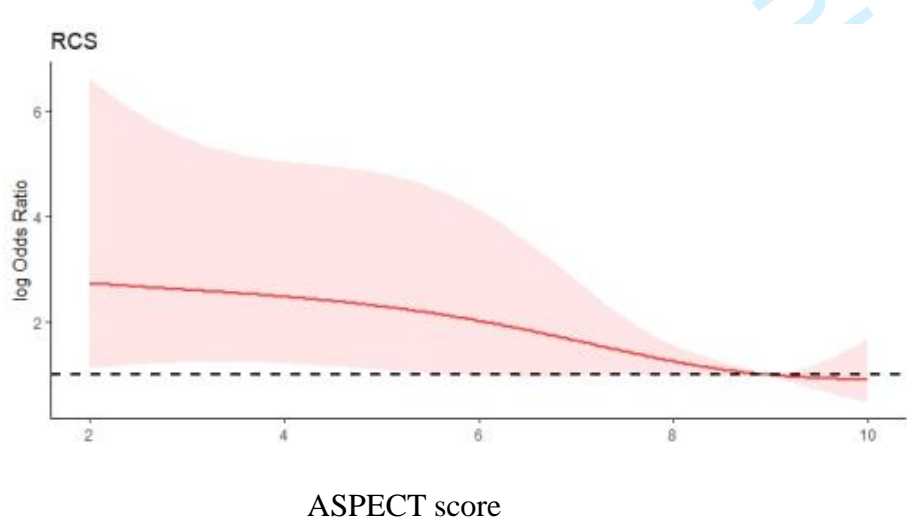

**D**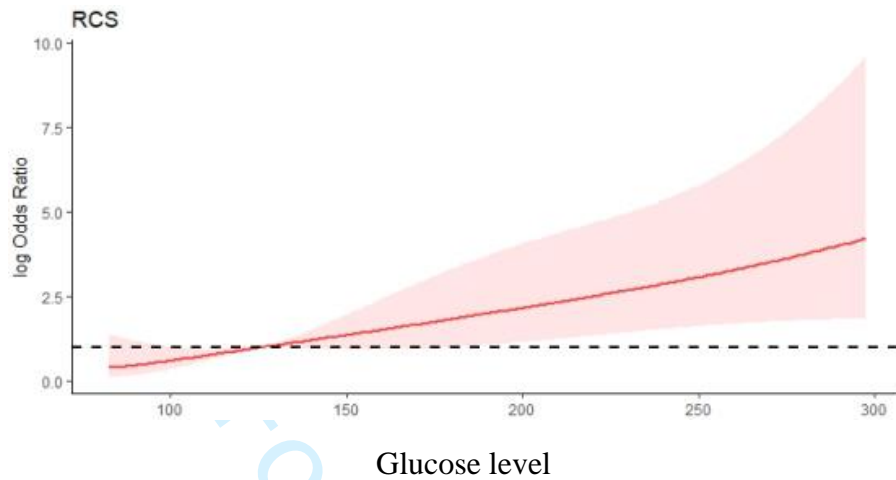

Figure I. Shape of association of 90-day mortality with age (A), National Institutes of Health Stroke Scale (NIHSS) score at baseline (B), Alberta Stroke Program Early Computed Tomography Score (ASPECTS) (C) and glucose level (D). The optimal cutoff value for discriminating deceased from survivor patients was 70 years for age, 17 for NIHSS score, 9 for ASPECT score and 130 mg/dl for glucose level.

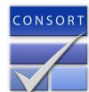

## CONSORT 2010 checklist of information to include when reporting a randomised trial\*

| Section/Topic                    | Item No | Checklist item                                                                                                                                                                              | Reported on page No |
|----------------------------------|---------|---------------------------------------------------------------------------------------------------------------------------------------------------------------------------------------------|---------------------|
| <b>Title and abstract</b>        |         |                                                                                                                                                                                             |                     |
|                                  | 1a      | Identification as a randomised trial in the title                                                                                                                                           | 1-2                 |
|                                  | 1b      | Structured summary of trial design, methods, results, and conclusions (for specific guidance see CONSORT for abstracts)                                                                     | 1-2                 |
| <b>Introduction</b>              |         |                                                                                                                                                                                             |                     |
| Background and objectives        | 2a      | Scientific background and explanation of rationale                                                                                                                                          | 3                   |
|                                  | 2b      | Specific objectives or hypotheses                                                                                                                                                           | 3                   |
| <b>Methods</b>                   |         |                                                                                                                                                                                             |                     |
| Trial design                     | 3a      | Description of trial design (such as parallel, factorial) including allocation ratio                                                                                                        | 3-4                 |
|                                  | 3b      | Important changes to methods after trial commencement (such as eligibility criteria), with reasons                                                                                          | NA                  |
| Participants                     | 4a      | Eligibility criteria for participants                                                                                                                                                       | 3-4                 |
|                                  | 4b      | Settings and locations where the data were collected                                                                                                                                        | 3-4                 |
| Interventions                    | 5       | The interventions for each group with sufficient details to allow replication, including how and when they were actually administered                                                       | 3-4                 |
| Outcomes                         | 6a      | Completely defined pre-specified primary and secondary outcome measures, including how and when they were assessed                                                                          | 3-4                 |
|                                  | 6b      | Any changes to trial outcomes after the trial commenced, with reasons                                                                                                                       | 3-4                 |
| Sample size                      | 7a      | How sample size was determined                                                                                                                                                              | 3-4                 |
|                                  | 7b      | When applicable, explanation of any interim analyses and stopping guidelines                                                                                                                | 3-4                 |
| <b>Randomisation:</b>            |         |                                                                                                                                                                                             |                     |
| Sequence generation              | 8a      | Method used to generate the random allocation sequence                                                                                                                                      | 3-4                 |
|                                  | 8b      | Type of randomisation; details of any restriction (such as blocking and block size)                                                                                                         | 3-4                 |
| Allocation concealment mechanism | 9       | Mechanism used to implement the random allocation sequence (such as sequentially numbered containers), describing any steps taken to conceal the sequence until interventions were assigned | 3-4                 |
| Implementation                   | 10      | Who generated the random allocation sequence, who enrolled participants, and who assigned participants to interventions                                                                     | 3-4                 |
| Blinding                         | 11a     | If done, who was blinded after assignment to interventions (for example, participants, care providers, those                                                                                | 3-4                 |

|                                                      |     |                                                                                                                                                   |      |
|------------------------------------------------------|-----|---------------------------------------------------------------------------------------------------------------------------------------------------|------|
|                                                      |     | assessing outcomes) and how                                                                                                                       |      |
|                                                      | 11b | If relevant, description of the similarity of interventions                                                                                       | 3-4  |
| Statistical methods                                  | 12a | Statistical methods used to compare groups for primary and secondary outcomes                                                                     | 3-4  |
|                                                      | 12b | Methods for additional analyses, such as subgroup analyses and adjusted analyses                                                                  | 3-4  |
| <b>Results</b>                                       |     |                                                                                                                                                   |      |
| Participant flow (a diagram is strongly recommended) | 13a | For each group, the numbers of participants who were randomly assigned, received intended treatment, and were analysed for the primary outcome    | NA   |
|                                                      | 13b | For each group, losses and exclusions after randomisation, together with reasons                                                                  | 5-6  |
| Recruitment                                          | 14a | Dates defining the periods of recruitment and follow-up                                                                                           | 5-6  |
|                                                      | 14b | Why the trial ended or was stopped                                                                                                                | NA   |
| Baseline data                                        | 15  | A table showing baseline demographic and clinical characteristics for each group                                                                  | 5-6  |
| Numbers analysed                                     | 16  | For each group, number of participants (denominator) included in each analysis and whether the analysis was by original assigned groups           | 5-6  |
| Outcomes and estimation                              | 17a | For each primary and secondary outcome, results for each group, and the estimated effect size and its precision (such as 95% confidence interval) | 5-6  |
|                                                      | 17b | For binary outcomes, presentation of both absolute and relative effect sizes is recommended                                                       | NA   |
| Ancillary analyses                                   | 18  | Results of any other analyses performed, including subgroup analyses and adjusted analyses, distinguishing pre-specified from exploratory         | NA   |
| Harms                                                | 19  | All important harms or unintended effects in each group (for specific guidance see CONSORT for harms)                                             | NA   |
| <b>Discussion</b>                                    |     |                                                                                                                                                   |      |
| Limitations                                          | 20  | Trial limitations, addressing sources of potential bias, imprecision, and, if relevant, multiplicity of analyses                                  | 10   |
| Generalisability                                     | 21  | Generalisability (external validity, applicability) of the trial findings                                                                         | 8-10 |
| Interpretation                                       | 22  | Interpretation consistent with results, balancing benefits and harms, and considering other relevant evidence                                     | NA   |
| <b>Other information</b>                             |     |                                                                                                                                                   |      |
| Registration                                         | 23  | Registration number and name of trial registry                                                                                                    | 2    |
| Protocol                                             | 24  | Where the full trial protocol can be accessed, if available                                                                                       | 3    |
| Funding                                              | 25  | Sources of funding and other support (such as supply of drugs), role of funders                                                                   |      |

\*We strongly recommend reading this statement in conjunction with the CONSORT 2010 Explanation and Elaboration for important clarifications on all the items. If relevant, we also recommend reading CONSORT extensions for cluster randomised trials, non-inferiority and equivalence trials, non-pharmacological treatments, herbal interventions, and pragmatic trials. Additional extensions are forthcoming: for those and for up to date references relevant to this checklist, see [www.consort-statement.org](http://www.consort-statement.org).

# BMJ Open

## Predictors of mortality in acute ischemic stroke treated with endovascular thrombectomy despite successful reperfusion: subgroup analysis of a multicenter randomized clinical Trial

|                                 |                                                                                                                                                                                                                                                                                                                                                                                                                                                                                                                                                                                                                                                                                                                                                                                                                                                                                                                                                                                                                                                                                                                                                                                                                                                                                                                                                                                                                                                                                                                                                 |
|---------------------------------|-------------------------------------------------------------------------------------------------------------------------------------------------------------------------------------------------------------------------------------------------------------------------------------------------------------------------------------------------------------------------------------------------------------------------------------------------------------------------------------------------------------------------------------------------------------------------------------------------------------------------------------------------------------------------------------------------------------------------------------------------------------------------------------------------------------------------------------------------------------------------------------------------------------------------------------------------------------------------------------------------------------------------------------------------------------------------------------------------------------------------------------------------------------------------------------------------------------------------------------------------------------------------------------------------------------------------------------------------------------------------------------------------------------------------------------------------------------------------------------------------------------------------------------------------|
| Journal:                        | <i>BMJ Open</i>                                                                                                                                                                                                                                                                                                                                                                                                                                                                                                                                                                                                                                                                                                                                                                                                                                                                                                                                                                                                                                                                                                                                                                                                                                                                                                                                                                                                                                                                                                                                 |
| Manuscript ID                   | bmjopen-2021-053765.R1                                                                                                                                                                                                                                                                                                                                                                                                                                                                                                                                                                                                                                                                                                                                                                                                                                                                                                                                                                                                                                                                                                                                                                                                                                                                                                                                                                                                                                                                                                                          |
| Article Type:                   | Original research                                                                                                                                                                                                                                                                                                                                                                                                                                                                                                                                                                                                                                                                                                                                                                                                                                                                                                                                                                                                                                                                                                                                                                                                                                                                                                                                                                                                                                                                                                                               |
| Date Submitted by the Author:   | 20-Jan-2022                                                                                                                                                                                                                                                                                                                                                                                                                                                                                                                                                                                                                                                                                                                                                                                                                                                                                                                                                                                                                                                                                                                                                                                                                                                                                                                                                                                                                                                                                                                                     |
| Complete List of Authors:       | Li, Hao; Maoming People's Hospital, Department of Neurology<br>Huang, Jinbo ; Maoming People's Hospital, Department of Neurology<br>Cao, Jie; Changzhou First People's Hospital, Neurosurgery<br>Ye, Shisheng; Maoming People's Hospital, Department of Neurology<br>Chen, Hai ; Maoming People's Hospital, Department of Neurology<br>Liao, Geng ; Maoming People's Hospital, Department of Neurology<br>Du, Weijie ; Maoming People's Hospital, Department of Neurology<br>Li, Chaomao ; Maoming People's Hospital, Department of Neurology<br>Yuan, Li ; Maoming People's Hospital, Department of Neurology<br>Fang, Ling ; Maoming People's Hospital, Department of Neurology<br>Yang, Pengfei; Naval Medical University Changhai hospital, Department of Neurosurgery<br>Zhang, Yongwei; Naval Medical University Changhai hospital, Department of Neurology<br>Xing, Pengfei; Naval Medical University Changhai hospital, Department of Neurology<br>Zhang, Xiaoxi ; Naval Medical University Changhai hospital, Department of Neurosurgery<br>Ye, Xiaofei; Naval Medical University, Department of Statistics<br>Peng, Ya; Changzhou No. 1 People's Hospital, Department of Neurosurgery<br>Liu, Sheng ; Jiangsu Provincial People's Hospital of Nanjing Medical University, Department of Radiology<br>Zhang, Liyong; Liaocheng People's Hospital, Department of Neurosurgery<br>Yang, Zhi; Maoming People's Hospital, Department of Neurology<br>Liu, Jianmin ; Naval Medical University Changhai hospital, Department of Neurosurgery |
| <b>Primary Subject Heading</b>: | Neurology                                                                                                                                                                                                                                                                                                                                                                                                                                                                                                                                                                                                                                                                                                                                                                                                                                                                                                                                                                                                                                                                                                                                                                                                                                                                                                                                                                                                                                                                                                                                       |
| Secondary Subject Heading:      | Surgery                                                                                                                                                                                                                                                                                                                                                                                                                                                                                                                                                                                                                                                                                                                                                                                                                                                                                                                                                                                                                                                                                                                                                                                                                                                                                                                                                                                                                                                                                                                                         |
| Keywords:                       | Stroke < NEUROLOGY, Neurology < INTERNAL MEDICINE, NEUROSURGERY                                                                                                                                                                                                                                                                                                                                                                                                                                                                                                                                                                                                                                                                                                                                                                                                                                                                                                                                                                                                                                                                                                                                                                                                                                                                                                                                                                                                                                                                                 |
|                                 |                                                                                                                                                                                                                                                                                                                                                                                                                                                                                                                                                                                                                                                                                                                                                                                                                                                                                                                                                                                                                                                                                                                                                                                                                                                                                                                                                                                                                                                                                                                                                 |

1  
2  
3  
4  
5  
6  
7  
8  
9  
10  
11  
12  
13  
14  
15  
16  
17  
18  
19  
20  
21  
22  
23  
24  
25  
26  
27  
28  
29  
30  
31  
32  
33  
34  
35  
36  
37  
38  
39  
40  
41  
42  
43  
44  
45  
46  
47  
48  
49  
50  
51  
52  
53  
54  
55  
56  
57  
58  
59  
60

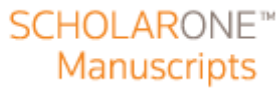





I, the Submitting Author has the right to grant and does grant on behalf of all authors of the Work (as defined in the below author licence), an exclusive licence and/or a non-exclusive licence for contributions from authors who are: i) UK Crown employees; ii) where BMJ has agreed a CC-BY licence shall apply, and/or iii) in accordance with the terms applicable for US Federal Government officers or employees acting as part of their official duties; on a worldwide, perpetual, irrevocable, royalty-free basis to BMJ Publishing Group Ltd ("BMJ") its licensees and where the relevant Journal is co-owned by BMJ to the co-owners of the Journal, to publish the Work in this journal and any other BMJ products and to exploit all rights, as set out in our [licence](#).

The Submitting Author accepts and understands that any supply made under these terms is made by BMJ to the Submitting Author unless you are acting as an employee on behalf of your employer or a postgraduate student of an affiliated institution which is paying any applicable article publishing charge ("APC") for Open Access articles. Where the Submitting Author wishes to make the Work available on an Open Access basis (and intends to pay the relevant APC), the terms of reuse of such Open Access shall be governed by a Creative Commons licence – details of these licences and which [Creative Commons](#) licence will apply to this Work are set out in our licence referred to above.

Other than as permitted in any relevant BMJ Author's Self Archiving Policies, I confirm this Work has not been accepted for publication elsewhere, is not being considered for publication elsewhere and does not duplicate material already published. I confirm all authors consent to publication of this Work and authorise the granting of this licence.

1  
2  
3  
4  
5  
6  
7  
8  
9  
10  
11  
12  
13  
14  
15  
16  
17  
18  
19  
20  
21  
22  
23  
24  
25  
26  
27  
28  
29  
30  
31  
32  
33  
34  
35  
36  
37  
38  
39  
40  
41  
42  
43  
44  
45  
46  
47  
48  
49  
50  
51  
52  
53  
54  
55  
56  
57  
58  
59  
60

**Title page**

1  
2  
3  
4  
5  
6  
7  
8  
9  
10  
11  
12  
13  
14  
15  
16  
17  
18  
19  
20  
21  
22  
23  
24  
25  
26  
27  
28  
29  
30  
31  
32  
33  
34  
35  
36  
37  
38  
39  
40  
41  
42  
43  
44  
45  
46  
47  
48  
49  
50  
51  
52  
53  
54  
55  
56  
57  
58  
59  
60

**Predictors of mortality in acute ischemic stroke treated with endovascular thrombectomy despite successful reperfusion: subgroup analysis of a multicenter randomized clinical Trial**

Hao Li1†, Jinbo Huang1†, Jie Cao2†, Shisheng Ye1, Hai Chen1, Geng Liao1, Weijie Du1, Chaomao Li1, Li Yuan1, Ling Fang1, Pengfei Yang3, Yongwei Zhang4, Pengfei Xing4, Xiaoxi Zhang3, Xiaofei Ye5, Ya Peng2, Sheng Liu6, Liyong Zhang7\*, Zhi Yang1\*, Jianmin Liu3, on behalf of the direct-mt investigators

Corresponding Author:

Liyong Zhang, [13346256936@163.com](mailto:13346256936@163.com); Zhi Yang, [mmyangz@163.com](mailto:mmyangz@163.com).

†Three authors contributed equally to this editorial.

Number of Tables: 2; Supplemental material:1; Word count: 3616.

**Keywords:** acute ischemic stroke; reperfusion; mortality; mechanical thrombectomy

1

2 **Abstract**

3 **Objectives:** We sought to determine the predictors of 90-day mortality despite  
4 successful reperfusion.

5 **Design:** Subgroup analysis of a multicenter randomized clinical trial.

6 **Setting:** This study used data from the DIRECT-MT ( Direct Intra-arterial  
7 thrombectomy in order to Revascularize AIS patients with large vessel occlusion  
8 Efficiently in Chinese Tertiary hospitals: a Multicenter randomized clinical Trial) trial.

9 **Participants:** 622 patients enrolled in DIRECT-MT.

10 **Results:** Overall successful reperfusion rate was 82.0% (510/622), and 18.5% (115/622)  
11 of patients died within 90 days. Univariate analysis identified increased risks of  
12 mortality for age  $\geq 70$  years, history of diabetes mellitus, National Institutes of Health  
13 Stroke Scale (NIHSS) score on admission  $\geq 17$ , NIHSS score after thrombectomy ( $24 \pm$   
14 6h)  $\geq 11$ , Alberta Stroke Program Early Computed Tomography Score (ASPECTS)  
15  $< 9$ , glucose level at hospital arrival  $\geq 130$  mg/dl, location of internal carotid artery  
16 occlusion, embolization into a new territory, symptomatic ICH, and a decreased risk of  
17 mortality for smoking. In multivariable analysis, smoking (OR, 0.38; 95% CI, 0.17 to  
18 0.83;  $P=0.015$ ), NIHSS score on admission  $\geq 17$  (OR, 3.14; 95% CI, 1.77 to 5.55;  
19  $P<0.001$ ), glucose level at hospital arrival  $\geq 130$  mg/dl (OR, 2.54; 95% CI, 1.51 to 4.27;  
20  $P<0.001$ ), symptomatic ICH (OR, 11.70; 95% CI, 4.74 to 28.89;  $P<0.001$ ) and NIHSS  
21 score after thrombectomy ( $24 \pm 6h$ )  $\geq 11$  (OR, 12.04; 95% CI, 5.09 to 28.46;  $P<0.001$ )  
22 were significant independent predictors of 90-day mortality.

23 **Conclusions:** Symptomatic ICH and high post-thrombectomy NIHSS score are strong  
24 predictor of 90-day mortality in acute ischemic stroke treated with mechanical  
25 thrombectomy despite successful reperfusion, as well as, high NIHSS score and high  
26 glucose level at hospital arrival. However, further studies need to be performed to  
27 confirm the association between smoking and mortality.

28 **Strengths and limitations of this study**

29 The study used a multicenter randomized clinical trial data from DIRECT-MT.

30 The large sample size provides robustness and strong statistical power for the reported

1 outcomes.

2 All patients in the DIRECT-MT trial were Chinese, which may limit the generalizability  
3 of the findings to other populations.

#### 4 **Introduction**

5 The overwhelming benefit of endovascular thrombectomy for acute ischemic  
6 stroke (AIS) with large-vessel occlusion in the anterior circulation has been  
7 demonstrated<sup>1-5</sup>. A large number of studies show that successful reperfusion was a  
8 powerful predictor of good outcomes in acute ischemic stroke. However, despite the  
9 rates of successful reperfusion (modified Thrombolysis in Cerebral Infarction( mTICI )  
10 score 2b or 3) up to 71%, the mortality at 90 days remains high, approximately up to  
11 15%<sup>6</sup>. Thus, it remains important to understand which factors influence mortality  
12 despite successful reperfusion. Some studies have identified predictors that influence  
13 mortality in patients with acute stroke treated with the thrombectomy, such as age,  
14 National Institute of Health Stroke Scale (NIHSS) score, vessel occlusion site, passes  
15 with the thrombectomy device and use of rescue therapy<sup>7, 8</sup>. But the predictors of  
16 mortality despite successful reperfusion have been less intensively addressed thus far.

17 Direct Intra-arterial thrombectomy in order to Revascularize AIS patients with  
18 large vessel occlusion Efficiently in Chinese Tertiary hospitals: a Multicenter  
19 randomized clinical Trial (DIRECT-MT) is an investigator-initiated, multicenter,  
20 prospective, randomized, open-label trial, designed to determine whether endovascular  
21 thrombectomy alone would be noninferior to combined treatment with endovascular  
22 thrombectomy preceded by intravenous alteplase in patients who had acute ischemic  
23 stroke with large-vessel occlusion in the anterior circulation<sup>9</sup>. Thus, in this subgroup  
24 analysis, using the data from DIRECT-MT trial, we investigated the predictors of 90-  
25 day mortality in acute ischemic stroke treated with endovascular thrombectomy despite  
26 successful reperfusion. Approval to conduct this study was obtained from the  
27 institutional review board.

#### 28 **Methods**

##### 29 **Patients Selection**

1  
2  
3  
4 1 Study patients were obtained from the DIRECT-MT trial of patients with good quality  
5  
6 2 final angiographic images (performed with digital subtraction angiography) could be  
7  
8 3 assessed for eTICI by the core laboratory. Details of the DIRECT-MT patient selection  
9  
10 4 can be found in the original report<sup>9</sup>.

## 11 5 **Data**

12  
13 6 In addition to patient demographic and baseline characteristics, data included  
14  
15 7 information on radiological imaging, procedural complications, symptomatic ICH,  
16  
17 8 NIHSS score after thrombectomy ( $24 \pm 6$ h) and clinical outcomes. Successful  
18  
19 9 reperfusion was defined as achieving the eTICI score (range, 0 [no reperfusion] to 3  
20  
21 10 [complete reperfusion]) of 2b, 2c, or 3 on the final angiogram after thrombectomy<sup>10</sup>.  
22  
23 11 Symptomatic intracranial hemorrhage (ICH) was defined on the basis of Heidelberg  
24  
25 12 criteria<sup>11</sup>. Cause of stroke was determined according to the medical history, clinical  
26  
27 13 features, and results on digital subtraction angiography, including cardioembolism,  
28  
29 14 large-artery occlusion and undetermined. All radiological imaging was assessed by an  
30  
31 15 independent imaging core-lab blinded to the trial group assignments. All imaging was  
32  
33 16 read by two independent readers and a consensus reading was performed by a senior  
34  
35 17 reader of each team in case of discrepancies. More details of the design, methods and  
36  
37 18 results of DIRECT-MT trial have been reported previously<sup>12</sup>.

## 38 19 **Statistical Analysis**

39  
40 20 Since for age, NIHSS score at baseline, NIHSS score after thrombectomy ( $24 \pm 6$ h),  
41  
42 21 Alberta Stroke Program Early Computed Tomography Score and glucose level at  
43  
44 22 hospital arrival we observed a nonlinear relationship, we determined the optimal cutoff  
45  
46 23 value discriminating between mortality and survival using restricted cubic spline  
47  
48 24 functions. Data are presented as numbers with percentages. Pearson chi-square test or  
49  
50 25 Fisher exact test was used to compared baseline characteristics, angiographic outcomes,  
51  
52 26 procedural complications and symptomatic ICH between the mortality and survival  
53  
54 27 groups in univariate analysis. In the first multivariable model, variables with  $P \leq 0.05$  in  
55  
56 28 the univariate analysis were included in the multivariable logistic regression model-  
57  
58 29 building process, except symptomatic ICH and NIHSS score after thrombectomy ( $24$

1  $\pm 6h$ ), to evaluate association with 90-day mortality. In the second multivariable model,  
2 symptomatic ICH was included as covariate to determine whether symptomatic ICH  
3 modifies the estimated effect of the baseline characteristics as predictors of mortality.  
4 In the third multivariable model, NIHSS score after thrombectomy ( $24 \pm 6h$ ) was  
5 included, except NIHSS score at baseline and symptomatic ICH, to evaluate association  
6 with 90-day mortality. Multivariable models were built basing on backwards selection.  
7 The retention criterion was set at  $p \leq 0.05$ . All data were processed using the SAS  
8 software, version 9.2 (SAS Institute).

### 9 **Patient and Public Involvement**

10 Patients and/or the public were not involved in the design, or conduct, or reporting, or  
11 dissemination plans of this research.

### 12 **Results**

13 The DIRECT-MT enrolled 656 consecutive patients with acute ischemic stroke treated  
14 with endovascular thrombectomy with or without intravenous alteplase. A total of 17  
15 patients were primarily excluded, because poor quality angiographic images could not  
16 be assessed for eTICI, thus leaving 622 patients to participate in the analysis. Of these,  
17 510 patients (77.7%) achieved successful reperfusion (eTICI  $\geq 2b$ ). Mortality was lower  
18 in patients with successful reperfusion compared with those without successful  
19 reperfusion (15.3% [78/510] versus 33.0% [37/112];  $P < 0.001$ ). In successful  
20 reperfusion patients, procedural complications (vessel dissection, contrast  
21 extravasation, embolization into a new territory, femoral access complications)  
22 occurred in 73 patients (14.3%).

23 The shape of the relationship with age, NIHSS score on admission, NIHSS score after  
24 thrombectomy ( $24 \pm 6h$ ), ASPECTS score and glucose level appeared to be nonlinear  
25 (online supplementary Figure I). We identified a value of 70 years for age, 17 for  
26 NIHSS score on admission, 11 for NIHSS score after thrombectomy ( $24 \pm 6h$ ), 9 for  
27 ASPECT score and 130 mg/dl for glucose level as optimal cutoff value for  
28 discriminating deceased from survived patients. Baseline characteristics, angiographic  
29 outcomes, procedural complications, NIHSS score after thrombectomy ( $24 \pm 6h$ ) and  
30 symptomatic ICH for study patients are summarized in table 1. The mortality group had

1 a significantly higher prevalence of age  $\geq 70$  years, diabetes mellitus, NIHSS score on  
2 admission  $\geq 17$ , NIHSS score after thrombectomy ( $24 \pm 6h$ )  $\geq 11$ , ASPECTS score  $< 9$ ,  
3 glucose level at hospital arrival  $\geq 130$  mg/dl, location of internal carotid artery occlusion,  
4 embolization into a new territory, symptomatic ICH than the survival group had.  
5 Inversely, prevalence of smoking was lower in mortality group. There was no  
6 difference was found for sex, hypertension, hypercholesterolemia, previous ischemic  
7 stroke, peripheral artery disease, heart disease, atrial fibrillation, chronic heart failure,  
8 myocardial infarction, mechanical aorta and/or mitral valve rep, statin, antiplatelet  
9 agents, anticoagulant pretreatment, intravenous thrombolysis, cause of stroke,  
10 anesthesia, extracranial stent placement, intracranial stent placement, vessel dissection,  
11 contrast extravasation, femoral access complications.

12 In the first multivariable analysis model (Table 2), NIHSS score on admission  $\geq 17$  (OR,  
13 3.14; 95% CI, 1.77 to 5.55;  $P < 0.001$ ) and glucose level at hospital arrival  $\geq 130$  mg/dl  
14 (OR, 2.54; 95% CI, 1.51 to 4.27;  $P < 0.001$ ) remained independently associated with a  
15 higher risk of mortality. The rate of smoking (OR, 0.38; 95% CI, 0.17 to 0.83;  $P = 0.015$ )  
16 remained lower in mortality group. In the second multivariable model, symptomatic  
17 ICH was significant (OR, 11.70; 95% CI, 4.74 to 28.89;  $P < 0.001$ ) when added to the  
18 model but did not substantively change the estimated effects of smoking, NIHSS score  
19 on admission  $\geq 17$ , and glucose level at hospital arrival  $\geq 130$  mg/dl. In the third  
20 multivariable model, NIHSS score after thrombectomy  $\geq 11$  (OR, 12.04; 95% CI, 5.09  
21 to 28.46;  $P < 0.001$ ) was also a significant independent predictors of 90-day mortality.

## 22 Discussion

23 In the present study, we used data from the DIRECT-MT trial to identify potential  
24 clinical, angiographic, procedural complications, and symptomatic ICH factors of 90-  
25 day mortality in acute ischemic stroke treated with endovascular thrombectomy despite  
26 successful reperfusion. We found that NIHSS score at baseline  $\geq 17$  and glucose level at  
27 hospital arrival  $\geq 130$  mg/dl were independently associated with higher mortality,  
28 whereas smoking was associated with lower risk of mortality. Furthermore,  
29 symptomatic ICH significantly increased mortality, whereas procedural complications  
30 were not associated with mortality. Similar to the original report of DIRECT-MT,

1 intravenous thrombolysis was not associated with 90-day mortality in successful  
2 reperfusion patients. Other factors, such as age, proximal occlusion, diabetes mellitus,  
3 although reported in previous studies<sup>8, 13</sup>, were not related to mortality in our analysis.  
4 For anterior circulation stroke, a high NIHSS score on admission has been correlated  
5 with 90-day mortality after endovascular thrombectomy despite successful reperfusion<sup>8</sup>,  
6 in line with the present study. This suggests that it is difficult to reverse the outcome of  
7 stroke with severe neurological deficit (as indicated by a high NIHSS score) despite  
8 successful reperfusion. Because a substantial volume of brain tissue is already  
9 irreversibly injured in acute ischemic stroke patients by the time reperfusion occurs. In  
10 DIRECT-MT, 36.6% of the patients had a good functional recovery at 90 days despite  
11 more than 80% of the patients achieved successful reperfusion, which also can be  
12 explained by the above reasons. We determined a NIHSS score cutoff value of 17 on  
13 admission and 11 at 24±6 hours after thrombectomy respectively, and NIHSS score  
14 higher than cutoff value increased the risk of a mortality approximately threefold and  
15 twelve times respectively. It indicates that post-thrombectomy (24±6 hours )NIHSS  
16 score was a stronger predictor than NIHSS score on admission.

17 In our study, we found that glucose level at hospital arrival  $\geq 130$  mg/dL can increase  
18 the risk of 90-day mortality. Hyperglycemia (defined as admission serum glucose  $>140$   
19 mg/dL), similarly to present study previously has been correlated with poor outcomes  
20 or mortality in acute ischemic stroke patients with large vessel occlusion after  
21 endovascular thrombectomy<sup>14, 15</sup>. In previous studies and present study, hyperglycemia  
22 was defined in accordance with the absolute glucose concentration, failing to  
23 distinguish between poor management of diabetes and a physiologic stress response to  
24 acute stroke. Recently, a novel index of stress hyperglycemia ratio (SHR, the admission  
25 random blood glucose divided by the glycosylated hemoglobin level) was proved to be  
26 a better predictor of poor outcome or mortality than absolute hyperglycemia in patients  
27 treated with endovascular thrombectomy<sup>16, 17</sup>. But we did not collect hemoglobin level  
28 and could not calculate SHR to assess the association between SHR and mortality after  
29 endovascular thrombectomy for acute occlusion in the anterior circulation. However,  
30 there is no evidence that the administration of intravenous insulin improves functional



1 outcomes or mortality rates in acute ischemic stroke<sup>18</sup>. Moreover, hyperglycemia may  
2 also occur after mechanical thrombectomy, both in diabetic and non-diabetic patients.  
3 And recent study demonstrated that glucose levels within 24 hours after mechanical  
4 thrombectomy is able to predict adverse outcomes in acute ischemic stroke<sup>19</sup>. But  
5 DIRECT-MT trial only collected the admission glucose level. Therefore, we could not  
6 evaluate the impact of the glucose levels within 24 hours after mechanical  
7 thrombectomy on stroke mortality.

8 Smoking is a well-known independent risk factor for stroke. Interestingly, previous  
9 studies have reported that smoking was associated with a lower risk of mortality<sup>20, 21</sup>,  
10 calling smoking paradox in literature. Currently, the mechanism of the smoking  
11 paradox has not yet been explained, and its existence is controversial. Some researchers  
12 insisted that the smoking paradox was probably caused by unmeasured or residual  
13 confounding, younger age and other differences in baseline characteristics, not the  
14 biological effects of smoking<sup>22-24</sup>. Statistical methods such as multivariable regression  
15 or propensity score analysis may address most, but not all, of the confounding in risk  
16 analyses. Furthermore, previous studies and our study did not distinguish current  
17 smokers from ex-smokers and had no medical record of the quantity of smoking.  
18 Therefore, we could not assess the effects of smoking status and quantity on the  
19 outcome.

20 We further found symptomatic ICH resulted in significantly increased mortality. In our  
21 study, 5.3% cases with successful reperfusion developed symptomatic ICH, similarly  
22 to what is reported in randomized controlled trials (4.4%)<sup>6</sup>. But there was no difference  
23 in the incidence of symptomatic ICH between successful reperfusion with failed  
24 reperfusion patients. Interestingly, Möhlenbruch et al. published a report on risk factors  
25 of intracranial hemorrhage after endovascular thrombectomy of anterior circulation  
26 ischemic stroke<sup>25</sup>. In their analysis, they found complete reperfusion (eTICI 3) were  
27 attributable to lower ICH rate in comparison to subtotal recanalization (eTICI 2b, eTICI  
28 2c), and had lower quantity of thrombectomy maneuvers, which was a risk factor of  
29 hemorrhagic transformation.

30 Our analysis has several limitations. Firstly, DIRECT-MT trial was designed in

1  
2  
3  
4 1 accordance with the 2015 American Heart Association/American Stroke Association  
5 2 guidelines<sup>26</sup>. All stent retriever devices approved by China Food and Drug  
6 3 Administration were allowed in the trial as a first line, and aspiration devices were  
7 4 allowed as a second option. Recently, newer generation devices such as aspiration  
8 5 catheters have been used as first-line devices for large vessel occlusion. Secondly, all  
9 6 patients in the DIRECT-MT trial were Chinese, which may limit the generalizability of  
10 7 the findings to other populations. In a pooled analysis of five thrombectomy trials,  
11 8 redominantly enrolled white patients, functional recovery was higher (46% VS 36.6%)  
12 9 despite a lower percentage of patients (71% VS more than 80%) with reperfusion<sup>6</sup>. It is  
13 10 possible that Chinese patients have more intracranial atherosclerotic lesions than white  
14 11 patients do<sup>27</sup>. Thirdly, DIRECT-MT trial did not distinguish current smokers from ex-  
15 12 smokers and had no medical record of the quantity of smoking, which probably resulted  
16 13 in the smoking paradox. And DIRECT-MT trial did not collect the glucose level after  
17 14 thrombectomy, which is also a predictor of outcomes. Finally, we could not exclude  
18 15 overfitting in multivariate analyses, as well as, a loss of power to identify independent  
19 16 predictors.

### 17 **Conclusions**

18 In conclusion, symptomatic ICH and high post-thrombectomy NIHSS score (NIHSS  
19 19 score $\geq$ 11) are strong predictor of 90-day mortality in acute ischemic stroke treated with  
20 20 endovascular thrombectomy despite successful reperfusion, as well as, high NIHSS  
21 21 score (NIHSS score $\geq$ 17) and glucose level (glucose level  $\geq$ 130mg/dl) at hospital arrival.  
22 22 However, further studies need to be performed to confirm the association between  
23 23 smoking and mortality.

### 24 **Author affiliations**

- 25 25 <sup>1</sup> Department of Neurology, Maoming People's Hospital, Maoming, China  
26 26 <sup>2</sup> Department of Neurosurgery, Third Affiliated Hospital of Soochow University,  
27 27 Changzhou, China  
28 28 <sup>3</sup> Department of Neurosurgery, Naval Medical University Changhai hospital, Shanghai,  
29 29 China  
30 30 <sup>4</sup> Department of Neurology, Naval Medical University Changhai hospital, Shanghai,

1  
2  
3  
4 1 China

5 2 <sup>5</sup> Department of Statistics, Naval Medical University Changhai hospital, Shanghai,  
6  
7 3 China

8  
9 4 <sup>6</sup> Department of Radiology, Jiangsu Provincial People's Hospital of Nanjing Medical  
10  
11 5 University, Nanjing, China

12  
13 6 <sup>7</sup> Department of Neurosurgery, Liaocheng People's Hospital of Shandong First Medical  
14  
15 7 University, Liaocheng, China

16  
17 8

18  
19 9 **Acknowledgement:** We thank all DIRECT-MT investigators.

20  
21 10

### 22 23 11 **Author Contributions**

24  
25 12 ZY, LYZ and JML contributed to conception and design of the study. HL, JBH, JC and  
26  
27 13 SSY drafted the manuscript or tables or figures. PFY, YWZ, PFX and XXZ contributed  
28  
29 14 to comments on the draft manuscript and revised the report. Site investigators  
30  
31 15 contributed to data acquisition not analysis. HC, GL, WJD, CML, LY, LF, YP and SL  
32  
33 16 coordinated the study. XFY conducted the statistical analysis.

34  
35 17

### 36 37 18 **Ethics Approval**

38  
39 19 This trial was approved by Ethics Committee (EC) of Shanghai Changhai Hospital (ID:  
40  
41 20 CHEC2018-003) on Jan 15,2018.

42  
43 21

### 44 45 22 **Conflict of Interest Statement**

46  
47 23 None declared.

48  
49 24

### 50 51 25 **Funding Sources**

52  
53 26 This study was supported by High-level Hospital Construction Research Project of  
54  
55 27 Maoming People's Hospital (no grant number).

56  
57 28

58  
59 29 **Data sharing statement:** The data that support the findings of this study are available  
60  
30 from the corresponding author upon reasonable request.

### References

1. Campbell B, Mitchell P, Kleinig T, et al. Endovascular therapy for ischemic stroke with perfusion-imaging selection. *The New England journal of medicine*. 2015;372:1009-18 doi: 10.1056/NEJMoa1414792
2. Saver J, Goyal M, Bonafe A, et al. Stent-retriever thrombectomy after intravenous t-pa vs. T-pa alone in stroke. *The New England journal of medicine*. 2015;372:2285-95 doi: 10.1056/NEJMoa1415061
3. Goyal M, Demchuk A, Menon B, et al. Randomized assessment of rapid endovascular treatment of ischemic stroke. *The New England journal of medicine*. 2015;372:1019-30 doi: 10.1056/NEJMoa1414905
4. Berkhemer O, Fransen P, Beumer D, et al. A randomized trial of intraarterial treatment for acute ischemic stroke. *The New England journal of medicine*. 2015;372:11-20 doi: 10.1056/NEJMoa1411587
5. Jovin T, Chamorro A, Cobo E, et al. Thrombectomy within 8 hours after symptom onset in ischemic stroke. *The New England journal of medicine*. 2015;372:2296-306 doi: 10.1056/NEJMoa1503780
6. Goyal M, Menon B, van Zwam W, et al. Endovascular thrombectomy after large-vessel ischaemic stroke: A meta-analysis of individual patient data from five randomised trials. *Lancet (London, England)*. 2016;387:1723-31 doi: 10.1016/s0140-6736(16)00163-x
7. Shi Z, Loh Y, Walker G, et al. Clinical outcomes in middle cerebral artery trunk occlusions versus secondary division occlusions after mechanical thrombectomy: Pooled analysis of the mechanical embolus removal in cerebral ischemia (merci) and multi merci trials. *Stroke*. 2010;41:953-60 doi: 10.1161/strokeaha.109.571943
8. Linfante I, Walker G, Castonguay A, et al. Predictors of mortality in acute ischemic stroke intervention: Analysis of the north american solitaire acute stroke registry. *Stroke*. 2015;46:2305-8 doi: 10.1161/strokeaha.115.009530
9. Yang P, Zhang Y, Zhang L, et al. Endovascular thrombectomy with or without intravenous alteplase in acute stroke. *N Engl J Med*. 2020;382:1981-93 doi: 10.1056/NEJMoa2001123
10. Goyal M, Fargen K, Turk A, et al. 2c or not 2c: Defining an improved revascularization grading scale and the need for standardization of angiography outcomes in stroke trials. *Journal of neurointerventional surgery*. 2014;6:83-6 doi: 10.1136/neurintsurg-2013-010665
11. von Kummer R, Broderick J, Campbell B, et al. The heidelberg bleeding classification: Classification of bleeding events after ischemic stroke and reperfusion therapy. *Stroke*. 2015;46:2981-6 doi: 10.1161/strokeaha.115.010049
12. Yang P, Treurniet K, Zhang L, et al. Direct intra-arterial thrombectomy in order to revascularize ais patients with large vessel occlusion efficiently in chinese

- 1 tertiary hospitals: A multicenter randomized clinical trial (direct-mt)-protocol.  
2 *International journal of stroke : official journal of the International Stroke*  
3 *Society*. 2020;15:689-98 doi: 10.1177/1747493019882837
- 4 13. Panni P, Gory B, Xie Y, et al. Acute stroke with large ischemic core treated by  
5 thrombectomy. *Stroke*. 2019;50:1164-71 doi: 10.1161/strokeaha.118.024295
- 6 14. Kim J, Jahan R, Saver J. Impact of glucose on outcomes in patients treated with  
7 mechanical thrombectomy: A post hoc analysis of the solitaire flow restoration  
8 with the intention for thrombectomy study. *Stroke*. 2016;47:120-7 doi:  
9 10.1161/strokeaha.115.010753
- 10 15. Goyal N, Tsivgoulis G, Pandhi A, et al. Admission hyperglycemia and  
11 outcomes in large vessel occlusion strokes treated with mechanical  
12 thrombectomy. *Journal of NeuroInterventional Surgery*. 2018;10:112 doi:  
13 10.1136/neurintsurg-2017-012993
- 14 16. Wang L, Zhou Z, Tian X, et al. Impact of relative blood glucose changes on  
15 mortality risk of patient with acute ischemic stroke and treated with mechanical  
16 thrombectomy. *Journal of Stroke and Cerebrovascular Diseases*. 2019;28:213-  
17 19 doi: 10.1016/j.jstrokecerebrovasdis.2018.09.036
- 18 17. Chen X, Liu Z, Miao J, et al. High stress hyperglycemia ratio predicts poor  
19 outcome after mechanical thrombectomy for ischemic stroke. *Journal of stroke*  
20 *and cerebrovascular diseases : the official journal of National Stroke*  
21 *Association*. 2019;28:1668-73 doi: 10.1016/j.jstrokecerebrovasdis.2019.02.022
- 22 18. Bellolio MF, Gilmore RM, Stead LG. Insulin for glycaemic control in acute  
23 ischaemic stroke. *The Cochrane database of systematic reviews*.  
24 2011: Cd005346 doi: 10.1002/14651858.CD005346.pub3
- 25 19. Merlino G, Smeralda C, Sponza M, et al. Dynamic hyperglycemic patterns  
26 predict adverse outcomes in patients with acute ischemic stroke undergoing  
27 mechanical thrombectomy. *Journal of clinical medicine*. 2020;9doi:  
28 10.3390/jcm9061932
- 29 20. Tong X, Wang C, Liao X, et al. Smoking-thrombolysis relationship depends on  
30 ischemic stroke subtype. *Stroke*. 2016;47:1811-6 doi:  
31 10.1161/strokeaha.116.013124
- 32 21. Ali S, Smith E, Bhatt D, et al. Paradoxical association of smoking with in-  
33 hospital mortality among patients admitted with acute ischemic stroke. *Journal*  
34 *of the American Heart Association*. 2013;2:e000171 doi:  
35 10.1161/jaha.113.000171
- 36 22. Zhang P, Guo Z, Sun X, et al. Meta-analysis of the smoker's paradox in acute  
37 ischemic stroke patients receiving intravenous thrombolysis or endovascular  
38 treatment. *Nicotine & tobacco research : official journal of the Society for*  
39 *Research on Nicotine and Tobacco*. 2019;21:1181-88 doi: 10.1093/ntr/ntz094
- 40 23. Kurmann R, Engelter S, Michel P, et al. Impact of smoking on clinical outcome  
41 and recanalization after intravenous thrombolysis for stroke: Multicenter cohort  
42 study. *Stroke*. 2018;49:1170-75 doi: 10.1161/strokeaha.117.017976

1  
2  
3  
4  
5  
6  
7  
8  
9  
10  
11  
12  
13  
14  
15  
16  
17  
18  
19  
20  
21  
22  
23  
24  
25  
26  
27  
28  
29  
30  
31  
32  
33  
34  
35  
36  
37  
38  
39  
40  
41  
42  
43  
44  
45  
46  
47  
48  
49  
50  
51  
52  
53  
54  
55  
56  
57  
58  
59  
60

24. Wang H, Huang C, Sun Y, et al. Smoking paradox in stroke survivors?: Uncovering the truth by interpreting 2 sets of data. *Stroke*. 2020;51:1248-56 doi: 10.1161/strokeaha.119.027012
25. Neuberger U, Kickingereder P, Schönenberger S, et al. Risk factors of intracranial hemorrhage after mechanical thrombectomy of anterior circulation ischemic stroke. *Neuroradiology*. 2019;61:461-69 doi: 10.1007/s00234-019-02180-6
26. Powers W, Derdeyn C, Biller J, et al. 2015 american heart association/american stroke association focused update of the 2013 guidelines for the early management of patients with acute ischemic stroke regarding endovascular treatment: A guideline for healthcare professionals from the american heart association/american stroke association. *Stroke*. 2015;46:3020-35 doi: 10.1161/str.0000000000000074
27. Wang Y, Zhao X, Liu L, et al. Prevalence and outcomes of symptomatic intracranial large artery stenoses and occlusions in china: The chinese intracranial atherosclerosis (cicas) study. *Stroke*. 2014;45:663-9 doi: 10.1161/strokeaha.113.003508

**Table1 Baseline characteristics, angiographic outcomes, procedural details and complications in mortality and survival at 90 days.**

|          | Mortality | Survival |         |
|----------|-----------|----------|---------|
| Variable | n=78      | n=432    | P value |

|    |                                    |           |            |         |
|----|------------------------------------|-----------|------------|---------|
| 1  |                                    |           |            |         |
| 2  |                                    |           |            |         |
| 3  |                                    |           |            |         |
| 4  | age $\geq$ 70                      | 49(62.82) | 198(45.83) | 0.0057  |
| 5  | sex (male)                         | 44(56.41) | 250(57.87) | 0.8102  |
| 6  |                                    |           |            |         |
| 7  | Diabetes Mellitus                  | 23(29.49) | 72(16.67)  | 0.0074  |
| 8  |                                    |           |            |         |
| 9  | Hypertension                       | 51(65.38) | 259(59.95) | 0.3659  |
| 10 |                                    |           |            |         |
| 11 | Hypercholesterolemia               | 1(1.28)   | 18(4.17)   | 0.3611  |
| 12 |                                    |           |            |         |
| 13 | Previous ischemic stroke           | 11(14.10) | 59(13.66)  | 0.9163  |
| 14 |                                    |           |            |         |
| 15 | Peripheral artery disease          | 0(0.00)   | 3(0.69)    | 1.0000  |
| 16 |                                    |           |            |         |
| 17 | Heart disease                      | 44(56.41) | 221(51.16) | 0.3928  |
| 18 |                                    |           |            |         |
| 19 | Atrial fibrillation                | 43(55.13) | 192(44.44) | 0.0815  |
| 20 |                                    |           |            |         |
| 21 | Chronic heart failure              | 4(5.13)   | 26(6.02)   | 0.9632  |
| 22 |                                    |           |            |         |
| 23 | Myocardial infarction              | 6(7.69)   | 23(5.32)   | 0.5717  |
| 24 |                                    |           |            |         |
| 25 | Mechanical aorta and/or mitral     | 1(1.28)   | 10(2.31)   | 0.8773  |
| 26 |                                    |           |            |         |
| 27 | valve rep                          |           |            |         |
| 28 |                                    |           |            |         |
| 29 | Smoking                            | 8(10.26)  | 112(25.93) | 0.0027  |
| 30 |                                    |           |            |         |
| 31 | Statin                             | 4(5.13)   | 37(8.56)   | 0.3042  |
| 32 |                                    |           |            |         |
| 33 | Antiplatelet agents                | 13(16.67) | 72(16.67)  | 1.0000  |
| 34 |                                    |           |            |         |
| 35 | Anticoagulant pretreatment         | 6(7.69)   | 34(7.87)   | 0.9571  |
| 36 |                                    |           |            |         |
| 37 | NIHSS score on admission $\geq$ 17 | 60(76.92) | 214(49.54) | <0.0001 |
| 38 |                                    |           |            |         |
| 39 | NIHSS score after thrombectomy     | 72(92.31) | 197(45.60) | <0.0001 |
| 40 |                                    |           |            |         |
| 41 | (24 $\pm$ 6h) $\geq$ 11            |           |            |         |
| 42 |                                    |           |            |         |
| 43 | ASPECT score < 9                   | 47(61.04) | 201(46.74) | 0.0208  |
| 44 |                                    |           |            |         |
| 45 | Intravenous thrombolysis           | 40(51.28) | 227(52.55) | 0.8370  |
| 46 |                                    |           |            |         |
| 47 | Glucose level $\geq$ 130 mg/dl     | 50        | 171        | <0.0001 |
| 48 |                                    |           |            |         |
| 49 | Location of intracranial artery    |           |            |         |
| 50 |                                    |           |            |         |
| 51 | occlusion                          |           |            |         |
| 52 |                                    |           |            |         |
| 53 | ICA                                | 40(51.28) | 142(32.87) | 0.0075  |
| 54 |                                    |           |            |         |
| 55 | M1 middle cerebral artery segment  | 32(41.03) | 248(57.41) |         |
| 56 |                                    |           |            |         |
| 57 | M2middle cerebral artery segment   | 6(7.69)   | 42(9.72)   |         |
| 58 |                                    |           |            |         |
| 59 | Cause of stroke                    |           |            |         |
| 60 |                                    |           |            |         |

|                                   |           |            |         |
|-----------------------------------|-----------|------------|---------|
| Cardioembolic                     | 39(50.00) | 189(43.75) | 0.510   |
| Large-artery occlusion            | 14(17.95) | 76(17.59)  |         |
| Undetermined                      | 25(32.05) | 167(38.66) |         |
| Anesthesia                        |           |            |         |
| Local anesthesia                  | 27(35.06) | 158(37.26) | 0.2423  |
| Sedation                          | 18(23.38) | 129(30.42) |         |
| General anesthesia                | 32(41.56) | 137(32.31) |         |
| Extracranial stent placement      | 2(2.56)   | 37(8.56)   | 0.0664  |
| Intracranial stent placement      | 11(14.10) | 37(8.56)   | 0.1232  |
| Procedural complications          |           |            |         |
| Vessel dissection                 | 2(2.56)   | 6(1.39)    | 0.7843  |
| Contrast extravasation            | 3(3.85)   | 7(1.62)    | 0.3891  |
| Embolization into a new territory | 14(17.95) | 40(9.26)   | 0.0217  |
| Femoral access complications      | 0(0.00)   | 1(0.23)    | 1.0000  |
| Symptomatic ICH                   | 16(20.51) | 11(2.55)   | <0.0001 |

1 NIHSS, National Institutes of Health Stroke Scale; ASPECTS, Alberta Stroke Program  
 2 Early Computed Tomography Score; ICA, internal carotid artery; ICH, intracranial  
 3 hemorrhage.

12 **Table 2. Independent predictors of 90-day mortality.**

| Model 1     |         | Model 2     |         | Model 3     |         |
|-------------|---------|-------------|---------|-------------|---------|
| OR (95% CI) | P value | OR (95% CI) | P value | OR (95% CI) | P value |



|                                          |                 |        |                   |        |                    |        |
|------------------------------------------|-----------------|--------|-------------------|--------|--------------------|--------|
| Smoking                                  | 0.38(0.17-0.83) | 0.015  | 0.30(0.13-0.70)   | 0.005  | 0.450(0.202-1.003) | 0.051  |
| NIHSS score on admission $\geq$ 17       | 3.14(1.77-5.55) | <0.001 | 3.08 (1.70-5.60)  | <0.001 | -                  | -      |
| Glucose level                            | 2.54(1.51-4.27) | <0.001 | 2.62(1.52-4.52)   | <0.001 | 2.174(1.270-3.721) | 0.005  |
| Symptomatic ICH                          | Not include     | -      | 11.70(4.74-28.89) | <0.001 | Not include        | -      |
| NIHSS score after thrombectomy $\geq$ 11 | Not include     | -      | Not include       | -      | 12.04(5.09-28.46)  | <0.001 |

1 NIHSS, National Institutes of Health Stroke Scale; ICH, intracranial hemorrhage.

2

1  
2  
3  
4  
5  
6  
7  
8  
9  
10  
11  
12  
13  
14  
15  
16  
17  
18  
19  
20  
21  
22  
23  
24  
25  
26  
27  
28  
29  
30  
31  
32  
33  
34  
35  
36  
37  
38  
39  
40  
41  
42  
43  
44  
45  
46  
47  
48  
49  
50  
51  
52  
53  
54  
55  
56  
57  
58  
59  
60

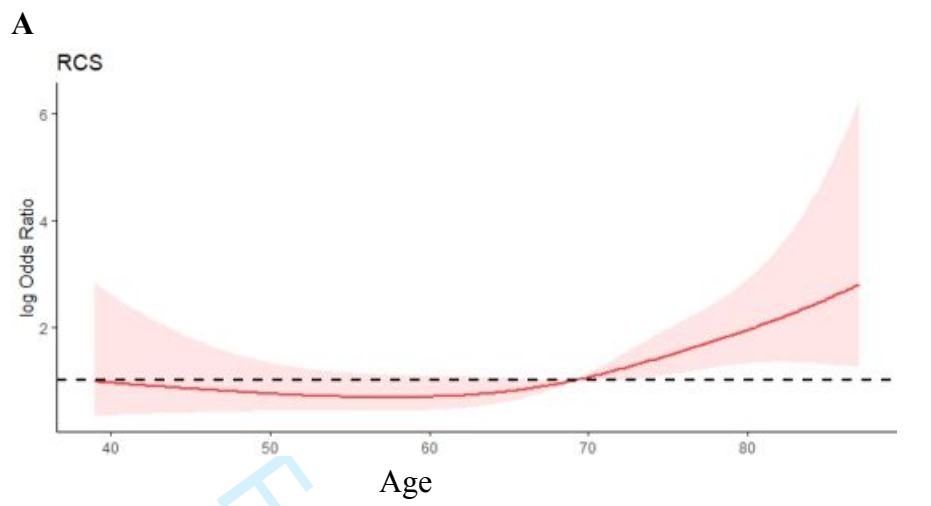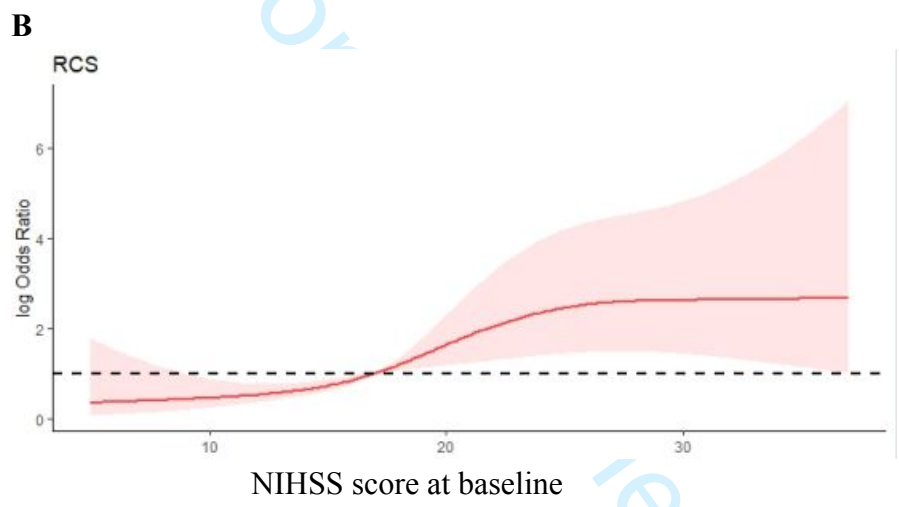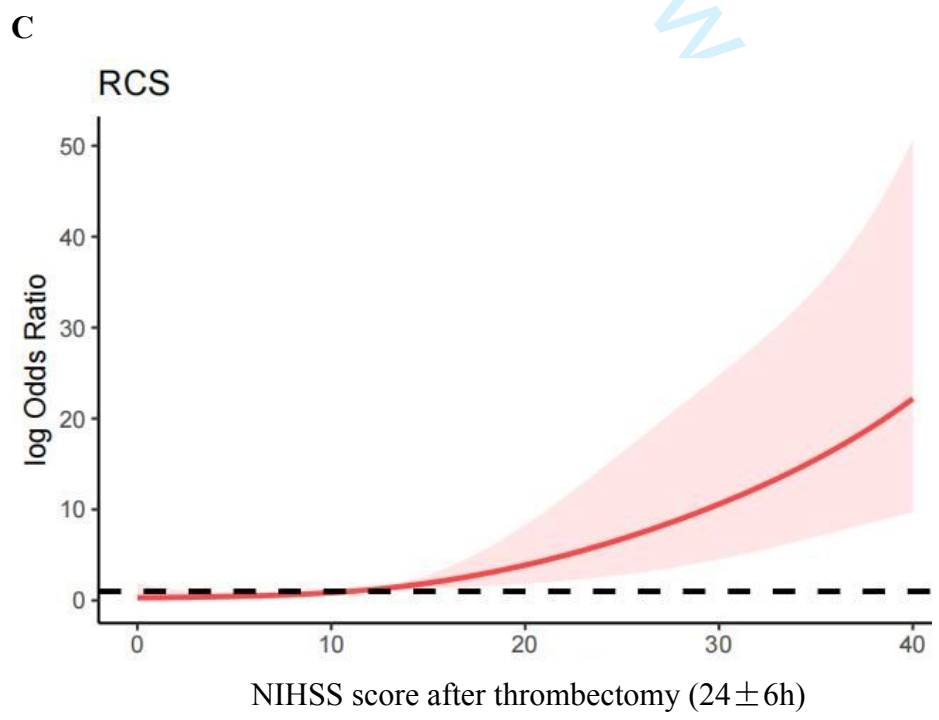

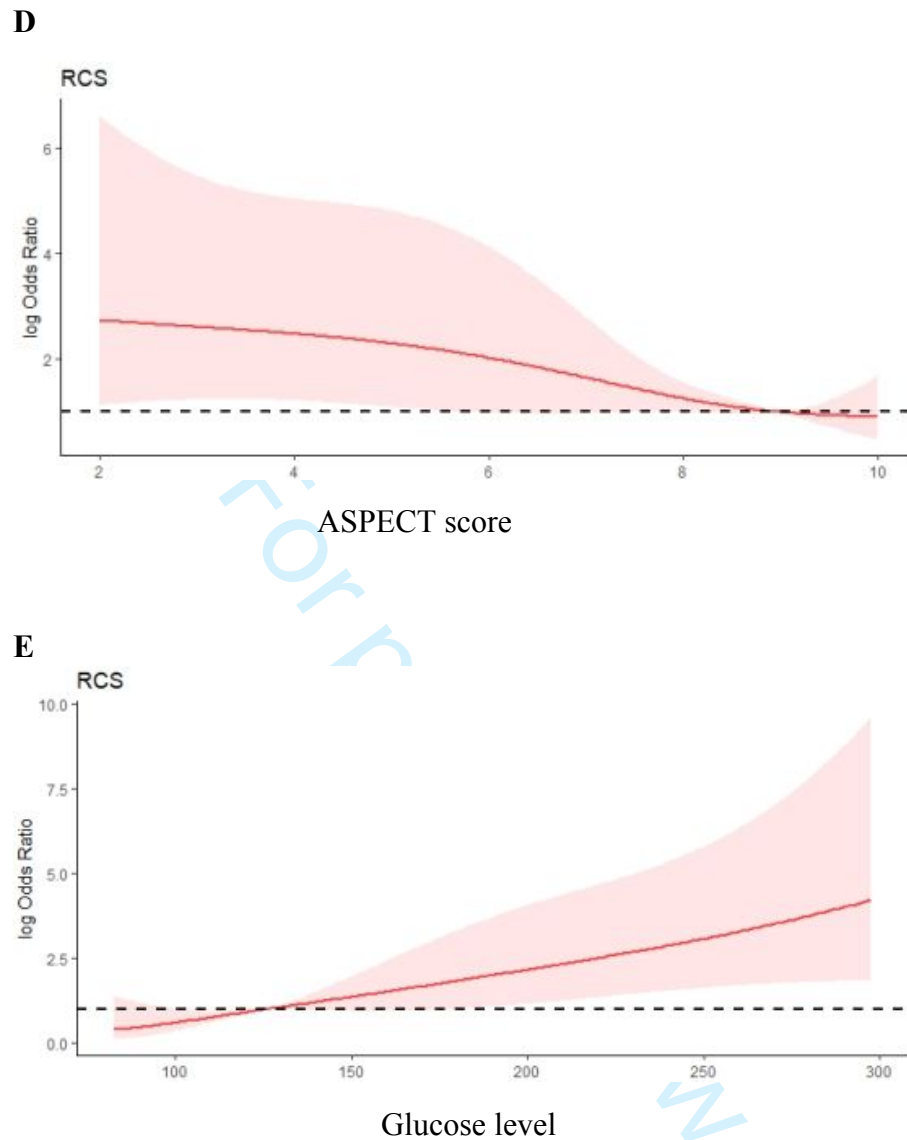

Figure I. Shape of association of 90-day mortality with age (A), National Institutes of Health Stroke Scale (NIHSS) score at baseline (B), NIHSS score after thrombectomy ( $24 \pm 6$ h) (C), Alberta Stroke Program Early Computed Tomography Score (ASPECTS) (D) and glucose level (E). The optimal cutoff value for discriminating deceased from survivor patients was 70 years for age, 17 for NIHSS score at baseline, 11 for NIHSS score after thrombectomy, 9 for ASPECT score and 130 mg/dl for glucose level.

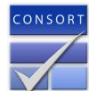

## CONSORT 2010 checklist of information to include when reporting a randomised trial\*

| Section/Topic                    | Item No | Checklist item                                                                                                                                                                              | Reported on page No |
|----------------------------------|---------|---------------------------------------------------------------------------------------------------------------------------------------------------------------------------------------------|---------------------|
| <b>Title and abstract</b>        |         |                                                                                                                                                                                             |                     |
|                                  | 1a      | Identification as a randomised trial in the title                                                                                                                                           | 1-2                 |
|                                  | 1b      | Structured summary of trial design, methods, results, and conclusions (for specific guidance see CONSORT for abstracts)                                                                     | 1-2                 |
| <b>Introduction</b>              |         |                                                                                                                                                                                             |                     |
| Background and objectives        | 2a      | Scientific background and explanation of rationale                                                                                                                                          | 3                   |
|                                  | 2b      | Specific objectives or hypotheses                                                                                                                                                           | 3                   |
| <b>Methods</b>                   |         |                                                                                                                                                                                             |                     |
| Trial design                     | 3a      | Description of trial design (such as parallel, factorial) including allocation ratio                                                                                                        | 3-4                 |
|                                  | 3b      | Important changes to methods after trial commencement (such as eligibility criteria), with reasons                                                                                          | NA                  |
| Participants                     | 4a      | Eligibility criteria for participants                                                                                                                                                       | 3-4                 |
|                                  | 4b      | Settings and locations where the data were collected                                                                                                                                        | 3-4                 |
| Interventions                    | 5       | The interventions for each group with sufficient details to allow replication, including how and when they were actually administered                                                       | 3-4                 |
| Outcomes                         | 6a      | Completely defined pre-specified primary and secondary outcome measures, including how and when they were assessed                                                                          | 3-4                 |
|                                  | 6b      | Any changes to trial outcomes after the trial commenced, with reasons                                                                                                                       | 3-4                 |
| Sample size                      | 7a      | How sample size was determined                                                                                                                                                              | 3-4                 |
|                                  | 7b      | When applicable, explanation of any interim analyses and stopping guidelines                                                                                                                | 3-4                 |
| <b>Randomisation:</b>            |         |                                                                                                                                                                                             |                     |
| Sequence generation              | 8a      | Method used to generate the random allocation sequence                                                                                                                                      | 3-4                 |
|                                  | 8b      | Type of randomisation; details of any restriction (such as blocking and block size)                                                                                                         | 3-4                 |
| Allocation concealment mechanism | 9       | Mechanism used to implement the random allocation sequence (such as sequentially numbered containers), describing any steps taken to conceal the sequence until interventions were assigned | 3-4                 |
| Implementation                   | 10      | Who generated the random allocation sequence, who enrolled participants, and who assigned participants to interventions                                                                     | 3-4                 |
| Blinding                         | 11a     | If done, who was blinded after assignment to interventions (for example, participants, care providers, those                                                                                | 3-4                 |

|                                                      |     |                                                                                                                                                   |      |
|------------------------------------------------------|-----|---------------------------------------------------------------------------------------------------------------------------------------------------|------|
|                                                      |     | assessing outcomes) and how                                                                                                                       |      |
|                                                      | 11b | If relevant, description of the similarity of interventions                                                                                       | 3-4  |
| Statistical methods                                  | 12a | Statistical methods used to compare groups for primary and secondary outcomes                                                                     | 3-4  |
|                                                      | 12b | Methods for additional analyses, such as subgroup analyses and adjusted analyses                                                                  | 3-4  |
| <b>Results</b>                                       |     |                                                                                                                                                   |      |
| Participant flow (a diagram is strongly recommended) | 13a | For each group, the numbers of participants who were randomly assigned, received intended treatment, and were analysed for the primary outcome    | NA   |
|                                                      | 13b | For each group, losses and exclusions after randomisation, together with reasons                                                                  | 5-6  |
| Recruitment                                          | 14a | Dates defining the periods of recruitment and follow-up                                                                                           | 5-6  |
|                                                      | 14b | Why the trial ended or was stopped                                                                                                                | NA   |
| Baseline data                                        | 15  | A table showing baseline demographic and clinical characteristics for each group                                                                  | 5-6  |
| Numbers analysed                                     | 16  | For each group, number of participants (denominator) included in each analysis and whether the analysis was by original assigned groups           | 5-6  |
| Outcomes and estimation                              | 17a | For each primary and secondary outcome, results for each group, and the estimated effect size and its precision (such as 95% confidence interval) | 5-6  |
|                                                      | 17b | For binary outcomes, presentation of both absolute and relative effect sizes is recommended                                                       | NA   |
| Ancillary analyses                                   | 18  | Results of any other analyses performed, including subgroup analyses and adjusted analyses, distinguishing pre-specified from exploratory         | NA   |
| Harms                                                | 19  | All important harms or unintended effects in each group (for specific guidance see CONSORT for harms)                                             | NA   |
| <b>Discussion</b>                                    |     |                                                                                                                                                   |      |
| Limitations                                          | 20  | Trial limitations, addressing sources of potential bias, imprecision, and, if relevant, multiplicity of analyses                                  | 10   |
| Generalisability                                     | 21  | Generalisability (external validity, applicability) of the trial findings                                                                         | 8-10 |
| Interpretation                                       | 22  | Interpretation consistent with results, balancing benefits and harms, and considering other relevant evidence                                     | NA   |
| <b>Other information</b>                             |     |                                                                                                                                                   |      |
| Registration                                         | 23  | Registration number and name of trial registry                                                                                                    | 2    |
| Protocol                                             | 24  | Where the full trial protocol can be accessed, if available                                                                                       | 3    |
| Funding                                              | 25  | Sources of funding and other support (such as supply of drugs), role of funders                                                                   |      |

\*We strongly recommend reading this statement in conjunction with the CONSORT 2010 Explanation and Elaboration for important clarifications on all the items. If relevant, we also recommend reading CONSORT extensions for cluster randomised trials, non-inferiority and equivalence trials, non-pharmacological treatments, herbal interventions, and pragmatic trials. Additional extensions are forthcoming: for those and for up to date references relevant to this checklist, see [www.consort-statement.org](http://www.consort-statement.org).
