# Supplementary material for: Predictors of mortality in acute ischemic stroke treated with endovascular thrombectomy despite successful reperfusion: subgroup analysis of a multicentre randomised clinical trial
Source: PubMed Central journal article supplement — BMJ Open. 2022 Mar 1;12(3):e053765. doi: 10.1136/bmjopen-2021-053765 (PMC8889322; doi:10.1136/bmjopen-2021-053765), 2022-03-01
Supplement: bmjopen-2021-053765supp001.pdf [file bmjopen-2021-053765supp001.pdf]

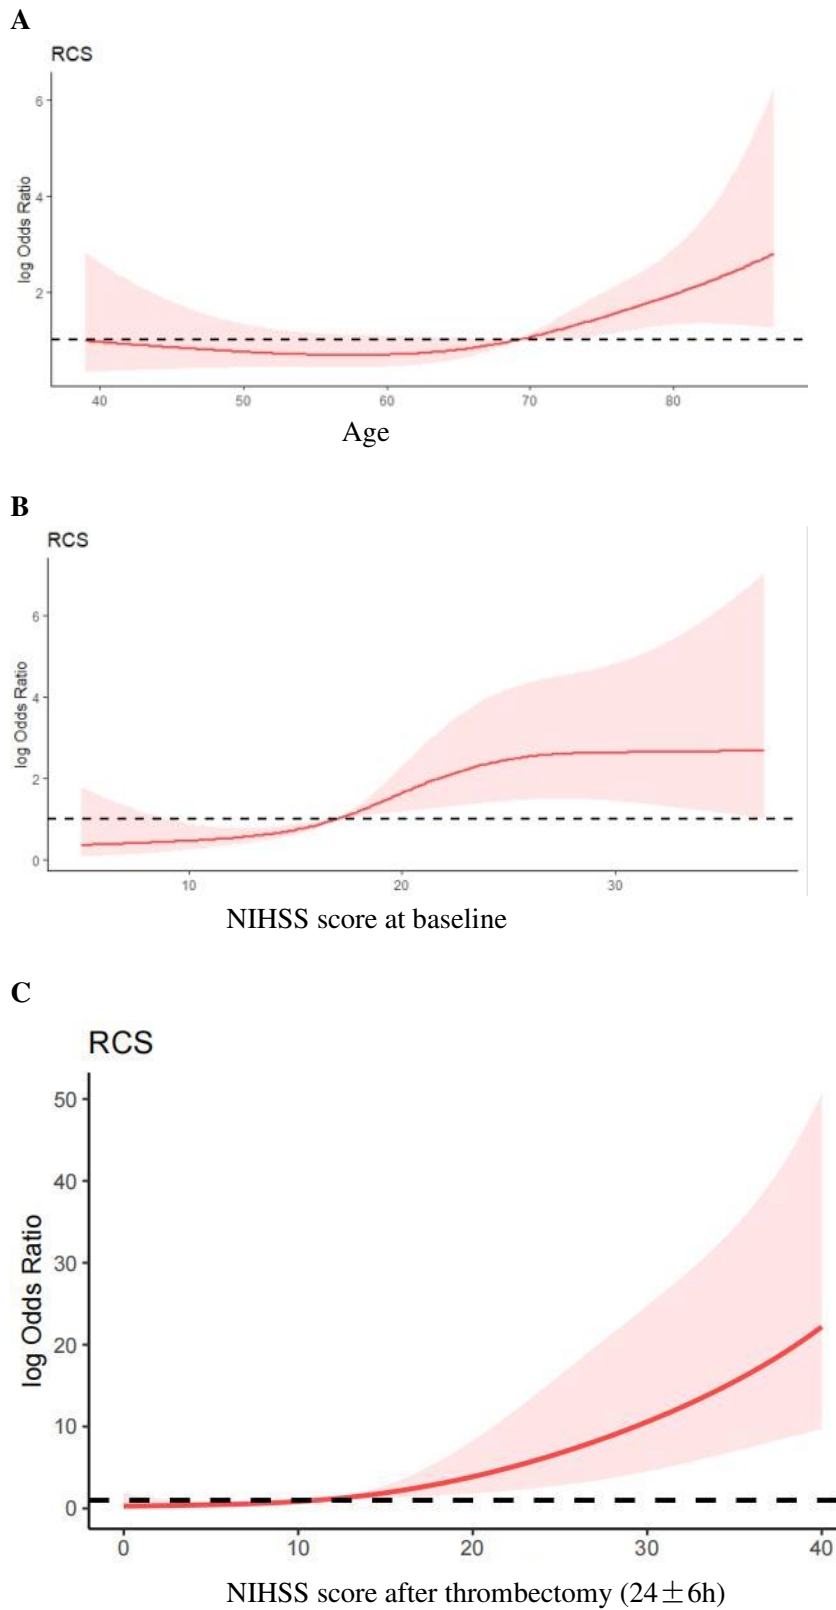

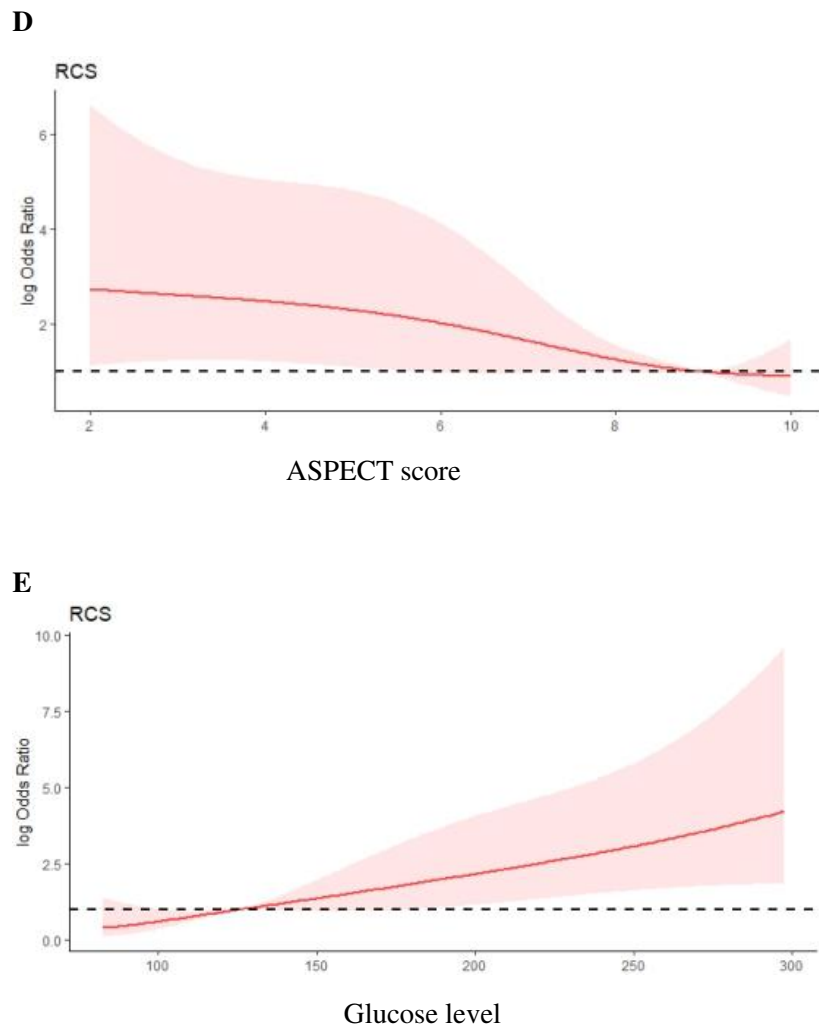

Figure I. Shape of association of 90-day mortality with age (A), National Institutes of Health Stroke Scale (NIHSS) score at baseline (B), NIHSS score after thrombectomy ( $24 \pm 6$ h) (C), Alberta Stroke Program Early Computed Tomography Score (ASPECTS) (D) and glucose level (E). The optimal cutoff value for discriminating deceased from survivor patients was 70 years for age, 17 for NIHSS score at baseline, 11 for NIHSS score after thrombectomy, 9 for ASPECT score and 130 mg/dl for glucose level.
